# Supplementary material for: ‘I can't be an addict. I am.’ Over-the-counter medicine abuse: a qualitative study
Source: PubMed Central journal article supplement — BMJ Open. 2013 Jun 15;3(6):e002913. doi: 10.1136/bmjopen-2013-002913 (PMC3693421; doi:10.1136/bmjopen-2013-002913), 2013-06-15

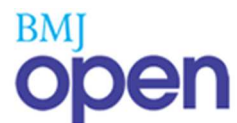

**'I Can't be an Addict. I am.' Over-the-Counter Medicine  
Addiction – a Qualitative Study**

|                                 |                                                                   |
|---------------------------------|-------------------------------------------------------------------|
| Journal:                        | <i>BMJ Open</i>                                                   |
| Manuscript ID:                  | bmjopen-2013-002913                                               |
| Article Type:                   | Research                                                          |
| Date Submitted by the Author:   | 19-Mar-2013                                                       |
| Complete List of Authors:       | Cooper, Richard; University of Sheffield, SCHARR                  |
| <b>Primary Subject Heading</b>: | Addiction                                                         |
| Secondary Subject Heading:      | Qualitative research                                              |
| Keywords:                       | QUALITATIVE RESEARCH, Substance misuse < PSYCHIATRY, PRIMARY CARE |
|                                 |                                                                   |

SCHOLARONE™  
Manuscripts

Peer Review Only

## 'I Can't be an Addict. I am.' Over-the-Counter Medicine Addiction – a Qualitative Study

### Abstract

**Objectives** - Over-the-counter (OTC) pharmacy medicines are considered relatively safe in contrast to prescribed and illicit substances but their addiction potential is increasingly recognised. Those affected represent a hard to reach group and little is known about their experiences. Study objectives were to describe the experiences and views of those affected by OTC medicine addiction, particularly in relation to why medicines were taken, how they were obtained, and associated treatment and support sought.

**Design** – Qualitative study using in-depth mainly telephone interviews.

**Participants** – A purposive sample of 25 adults, aged 20-60s, 13 female.

**Setting** – United Kingdom, via two internet support groups.

**Results** – Individuals considered themselves socially and economically active and different from illicit substance misusers and blamed themselves for losing control over their medicine use. This began usually for genuine medical reasons and not experimentation and was often linked to the cessation of, or ongoing, medical prescribing. Codeine, in compound analgesics, was the main medicine implicated with three distinct dose ranges emerging, with decongestant and sedative antihistamine abuse also being reported. Subsequent use was for the 'buzz' or similar effects of the opiate, which was obtained unproblematically by having lists of pharmacies to visit and occasionally using internet suppliers. Perceived withdrawal symptoms were described for all three dose ranges, and work and health problems were reported with higher doses. Mixed views about different treatment and support options emerged, with standard drug treatment services being considered inappropriate for OTC medicines and concerns that this 'hidden addiction' was recorded formally in medical notes. Most supported the continued availability of OTC medicines with appropriate addiction warnings.

**Conclusions** - Greater awareness of the addiction potential of OTC medicines is needed for the public, pharmacists and medical prescribers, along with appropriate communication about, and reviews of, treatment and support options, for this distinct addiction group.

### Article Focus

- Over-the-counter medicines are increasingly recognised as having addiction potential.
- To describe the experiences and views of individuals addicted to over-the-counter medicines?

### Key Messages

- Addiction to over-the-counter medicines was associated with genuine medical reasons initially and linked to medical prescribing.
- Codeine is main medicine abused for non-therapeutic effects in distinct dose ranges, but other medicines also identified.
- Current treatment may not be appropriate, based on hidden nature of over-the counter addiction and perceived differences to other forms of addiction.

### Strengths and Weaknesses

- First qualitative study to explore variety of over-the-counter addictions and associated reasons and treatment, in a recognised hard to reach group.
- Recruitment via internet support groups reflects only those with internet access and those who have identified themselves already as having an addiction problem.

## Introduction

In contrast to prescribed and illicit drugs, those available for individuals to purchase legally without prescription have often been perceived to be relatively safe.[1, 2] Such non-prescription, or over-the-counter (OTC) medicines as they are also known, are typically those purchased from pharmacies but increasingly the internet [3] and have enabled individuals to be active participants in their own health.[4] There has been increasing concern, however, about the potential for OTC medicines to cause harm, as a recent All Party Parliamentary report [5], and a joint consensus statement [6] on addiction to medicines in the United Kingdom (UK) illustrate. Implicated medicines and therapeutic groups include stimulants, laxatives, sedatives, disassociative substances and opiate-containing medicines such as codeine.[7, 8] There has been increased reporting of harms associated with codeine addiction and particularly from side effects of additional ingredients, such as ibuprofen and paracetamol which have led to fatalities.[7, 9] These have resulted in regulatory changes in countries such as the UK [10] and Australia involving restricted indications and addiction warnings on codeine-containing analgesic packets.

Despite these emerging concerns, the scale of the problem remains uncertain and very little is known about the characteristics and particularly the experiences of those affected. Empirical quantitative studies have provided some evidence suggesting a diverse group of individuals may be affected, ranging from adolescents experimenting with cough medicines in the USA,[11] to older individuals abusing analgesics in Nigeria,[12] and abuse of codeine-containing medicines and sedatives involving '*middle-aged females*' in the UK. [13, 14] Such individuals have been recognised as a hard to reach group [5] and this has resulted in indirect attempts to describe those affected, such as seeking pharmacists' proxy views of those affected through surveys. [7, 15] This paper describes the findings of a study that sought to explore the views and experiences of individuals who considered themselves affected by OTC medicine addiction in the UK, to understand how it arose, what medicines were implicated and how they were obtained, and what forms of treatment and support were used.

## Methods

A qualitative methodology – neglected to date in this area - was adopted for this study, which represented part of a larger overall study that included stakeholders and pharmacy staff [16] - using semi-structured in-depth mainly

1  
2  
3 telephone interviews. Purposive sampling was used, based on a review of the literature,[7] to ensure that a range of  
4 ages, gender, medicines used, reasons for initial use (genuine or experimental) and treatment and support options  
5 were represented. Individuals describing only prescribed medicines were excluded and since the aim was to capture  
6 self-perception of OTC medicine addiction, a dependency screening measure was not considered appropriate.[17]  
7  
8 Recruitment was undertaken via two internet-based support groups for those affected - 'Overcount' and  
9 'Codeinefree'. A total of twenty five interviews were undertaken (see table one) over an 18 month period between  
10 2009 and 2010, reflecting a slow uptake to participate. This was considered to be related to the hard to reach nature  
11 of this group, and prospective participants often made initial contact to discuss provisions for remaining anonymous  
12 in the study. The final sample size was determined by theoretical saturation being achieved in emergent themes. An  
13 interview schedule was developed based on a review of the literature [7]. Interviews were conducted by telephone in  
14 all but two cases, and were digitally audio recorded and then fully transcribed and anonymised. Analysis of  
15 transcripts involved an initial process of open coding, which was also informed by the themes from the available  
16 literature [7] and the interview schedule. Axial coding between participant transcripts was then undertaken using the  
17 constant comparison process which involved reading and re-reading transcripts, to identify links between emerging  
18 codes and participants and their characteristics. A final process of further refining of themes was undertaken until  
19 these provided explanatory accounts of the data. University ethical approval was obtained.  
20  
21  
22  
23  
24  
25  
26  
27  
28  
29  
30  
31  
32  
33  
34  
35  
36  
37  
38

## 39 **Results**

40  
41 Analysis of interviews revealed three broad, chronological themes: initial use of the medicine, often linked to  
42 genuine medical reasons; awareness of a problem with the medicine over time, with three distinct groups of dose  
43 levels being apparent, and finally attempts to seek treatment and help, which were associated with varying degrees  
44 of success. All participants described having a problem with an opiate (codeine and occasionally dihydrocodeine),  
45 although the stimulant decongestant pseudoephedrine and sedative antihistamines in sleeping medicines or cold  
46 remedies were also referred to by some. However, spanning these themes was also a dominant concern relating to  
47 the hidden nature of OTC medicine addiction and of participant's presentation of themselves as being normal and  
48 distinct from those with other, illicit addictions. This theme will be described along with other themse related to the  
49 unproblematic nature of obtaining medicines and views about regulation and responsibility.  
50  
51  
52  
53  
54  
55  
56  
57  
58  
59  
60

### *Initial use of OTC medicines*

Genuine medical reasons were almost always associated with the initial use of an OTC medicine and due to the involvement of codeine for almost all of these patients, there was a not unexpected range of pain-related symptoms or conditions, including headaches and migraine, abdominal and period pain, and hangover treatments. Of note was that there was often an association with medically prescribed medicines, either through initial prescribing that had then stopped or on-going prescribing (figure one):

*I mean my story started by being on painkillers for gynaecological problems and that was when I first took codeine [...] Then I found when I couldn't get codeine on prescription any longer it was readily available over the counter. P9*

Participants using both prescribed and OTC medicines described either using OTC medicines to cover gaps before a new prescription started, or to allow the strength of medicine used to be varied. In contrast, two participants described intentionally experimenting with an OTC medicine – pseudoephedrine and codeine - having been told about their abuse potential by others (see figure two).

For all those participants who described a genuine initial use of a product, this led eventually to the medicine being taken for different reasons. The key reason cited related to codeine and whilst the effect varied, common phrases used were the 'buzz' or 'calm' associated with its use, although exploiting sedative side effects were also reported by some:

*I remember when I took them that it would give you a lift and a buzz, but that lift or buzz would go and the only way to sustain that is to take more. P11*

Pseudoephedrine was associated with its stimulant-related side effects and antihistamines like diphenhydramine were used to promote sleep. Participants reflected that abused medicines and particularly codeine allowed them to cope, particularly with significant life events such as bereavements, work or relationship problems.

### *Obtaining Medicines*

1  
2  
3 Participants all described the use of pharmacies to obtain supplies and two also described using internet pharmacies.  
4  
5 A key feature of both was how unproblematic it was to obtain medicines, with policies to restrict supplies being  
6  
7 perceived to be ineffective, and some pharmacies were considered easier than others to obtain supplies (table two).  
8  
9 Avoiding detection was a key concern for individuals, who described intentionally varying the pharmacy used, using  
10  
11 ‘schedules, ‘tables’ or ‘lists’ of those visited, and lying and fabricating responses to questions from staff.  
12  
13

14 *I had to go to different pharmacies and I didn't want to get knocked back. I would go in and I*  
15 *would make out that I had a toothache, so I didn't know the best thing. I wouldn't directly ask for*  
16 *the product, because I know that was suspicious.* P10  
17  
18  
19  
20

21 Most participants did recall isolated and uncomfortable instances of being challenged; in some cases resulting in  
22  
23 avoiding that pharmacy or visiting less, but several participants considered these challenges to have influenced their  
24  
25 attempts to seek help.  
26  
27

28 Internet pharmacy purchases were mentioned by two participants, who reported being able to obtain multiple  
29  
30 quantities repeatedly. Although policies varied between suppliers, questionnaires or identification checks were  
31  
32 recognized as being mechanisms that were intended to limit supplies, but which could be easily circumvented. Other  
33  
34 participants were cautious of internet medicine supplies and expressed concerns about the lack of safety of such  
35  
36 supplies.  
37  
38

### 39 ***Awareness of a problem***

40  
41

42 The second key chronological theme involved participants becoming aware of having a problem. Strikingly, the  
43  
44 words ‘addiction’ or ‘addicted’ were frequently spontaneously used by participants to describe themselves and their  
45  
46 situation. Awareness of a problem centred mainly on perceived withdrawal symptoms, although awareness of  
47  
48 prolonged consumption over time, critical incidents and a perceived loss of control generally were also identified.  
49  
50 Anxiety, generalized pain or headache and gastro-intestinal problems were variously described and attributed to the  
51  
52 medicine having been stopped:  
53  
54

55 *Yeah I am an addict, no doubt about it. As much as a heroin addict, yeah. Shameful and it makes*  
56 *you feel dirty and guilty, but I was an addict, yeah. Well I have stopped taking codeine before and*  
57  
58  
59  
60

1  
2  
3 *for the past few days I have had cold sweats and had palpitations and had withdrawal symptoms.*

4  
5 *So the physical symptoms suggest that I am addicted to it and also the psychological. P10*

6  
7  
8 Critical incidents such as rare instances of being confronted in a pharmacy, medical problem such as a gastro-  
9 intestinal bleed, or illegal activity also appeared to represent moments when participants considered themselves to  
10 have a problem. A recurrent theme involved participants' perceived loss of control over their medicine consumption,  
11 either gradually and suddenly, and several participants expressed disbelief that addiction could have happened to  
12 them, and often drew upon professional, educational status or intelligence claims to argue that they should have had  
13 the understanding or insight to prevent this happening.  
14  
15

16  
17  
18 The role of the two internet support forums – particularly in postings of other individual's descriptions - appeared to  
19 be confirmatory of their problem and participants' use of words like 'addiction' and 'rebound headache' appeared to  
20 have originated from here. Several argued that genetic factors –in references to family members with addictions -  
21 might explain their OTC medicine addiction, and several felt their personality and previous problems – with alcohol  
22 misuse for example – was explanatory. In these accounts, participants made explicit and sustained attempts to  
23 distinguish themselves from individuals with other addictions and particularly illicit substance users, who they  
24 viewed more negatively in both a behavioural and visual sense:  
25  
26  
27  
28  
29  
30  
31  
32  
33  
34  
35

36 *Addicts are people on the street who haven't got a job and I am sat here in a suit in an office, my*  
37 *own office with a very good career, senior manager within a very large organisation and I can't*  
38 *be an addict. I am. P5*

39  
40  
41  
42 A respectable appearance, good employment status and education were often cited as reasons why participants were  
43 different, although there was also recognition that their addiction was ultimately the same.  
44  
45  
46  
47  
48  
49  
50

### 51 ***Three types of OTC medicine abuse***

52  
53  
54 A distinction was evident between participants based upon the quantities of medicines taken, with three types  
55 emerging (figure two) which were relative to the recommended maximum doses of specific products. A first group  
56 was characterised by self-reported use that never exceeded the recommended maximum dose of a medicine. A  
57  
58  
59  
60



1  
2  
3 second type involved daily doses slightly above the maximum recommended dosage and often involving  
4 paracetamol and codeine (500mg and 8mg per tablet respectively) compound analgesics formulations and this  
5 occurred sometimes due to combinations of OTC and prescribed medicines. In both these groups, there was  
6 awareness of the harms associated with the medicine, and use for non-therapeutic reasons and perceived withdrawal.  
7 Such participants often explicitly defended their addiction status, despite the relatively low doses, and appeared  
8 aware – usually from posts on internet support groups – of individuals taking much higher doses. Such higher doses  
9 represented the third type of consumption identified in this study and was characterised by doses much higher than  
10 recommended, with those describing codeine and ibuprofen (12.8mg and 200mg per tablet respectively) compound  
11 tablet use, for example, reporting daily consumption of between 32 and 64 tablets:  
12  
13  
14  
15  
16  
17  
18  
19

20  
21  
22 *[...] I would take eight in one day. But then of course in increasing amounts. Till the point came*  
23 *that I was taking thirty two a day. Even on really bad days, I would take a second lot of thirty two.*

24  
25  
26 P9  
27  
28

29 Distinct to this group was that three participants had described criminal activity relating to their addiction –  
30 convictions for theft being mentioned in two cases – and this group alone was associated with descriptions of  
31 significant health problems, including gastric bleeding and hospitalization following organ damage; significant  
32 purchasing costs were also associated with this group. However, despite these more significant issues, this group  
33 similarly differentiated themselves from those with other forms of addiction and in two cases referred to their health-  
34 care professional backgrounds to support their claims.  
35  
36  
37  
38  
39  
40  
41  
42  
43  
44

#### 45 ***A 'hidden' addiction***

46  
47 In describing their situations, individuals often described overt attempts to keep their problem hidden, and this  
48 occurred particularly at work where concerns about a perceived change in appearance or behaviour were thought  
49 likely to arouse suspicions amongst colleagues. Of note was that it was the change in appearance that worried  
50 participants primarily, and not being seen taking a medicine, which was considered by them to be an everyday  
51 activity which would not arouse suspicion in itself. Keeping medicine abuse hidden from family and home  
52 environments was also identified, although for a minority, friends and family were aware and had provided support.  
53  
54  
55  
56  
57  
58  
59  
60

1  
2  
3 Many participants also referred to the influence of OTC abuse on their family and relationships more generally, with  
4 a tension being apparent in trying to keep OTC addiction secret but recognising the support that others could offer.  
5  
6 For some, family and friends were viewed positively and provided support when a participant was trying to seek  
7  
8 treatment, but in other cases much less so:  
9

10  
11  
12 *To be honest, I can't discuss it with my family. They simply wouldn't understand. It would be a*  
13  
14 *horror for them. And they don't deal with things like that very well, at all.* P6  
15  
16  
17  
18  
19

### 20 ***Treatment and support***

21  
22  
23 The third main chronological theme concerned subsequent attempts by all individuals to address their OTC medicine  
24 addiction. These varied considerably and appeared in part related to the quantities of medicine taken (table 2) and  
25 included internet support group help in all cases, as well as National Health Service (NHS) medical General  
26 Practitioner (GP) consultations, specialist NHS drug and alcohol treatment (DAAT) services, a private clinic,  
27 counselling, self-management and narcotics anonymous (see figure two). Perceived benefits of these varied, with  
28 initial self-treatment, for example, often being considered ineffective and there was a view that several services,  
29 particularly narcotics anonymous and specialist drug services, were not suited to OTC medicine addiction.  
30  
31 Participants' need for anonymity was again evident, with concerns being expressed about addiction being recorded  
32 in medical notes and employers and others becoming aware; this extended to the intentional use of pseudonyms by  
33 participants on internet support groups. Of note was that pharmacists were not considered relevant for treatment and  
34 support.  
35  
36

37  
38  
39 GP involvement led to both positive and negative comments although some participants had specifically not sought  
40  
41 GP advice, due either to poor existing relationships or, linked to the hidden nature of this issue, concerns about their  
42  
43 addiction being recorded. Many participants felt their doctor considered OTC medicine addiction to be less serious  
44  
45 than other addictions and something not to be concerned about or suited to simple self-management:  
46  
47  
48  
49  
50  
51  
52

53  
54  
55 *[...] I have mentioned it to the doctor and he sort of said, 'well it's something you handle*  
56  
57 *yourself'. At this sort of level [...]* P19  
58  
59  
60

1  
2  
3 Some GPs had attempted to treat, although experiences suggested this was not successful:  
4  
5

6 *[...] my GP, he tried to detox me with the dihydrocodeine [...] I just ended up taking the tablets*  
7  
8 *over a week, you know, that was failure you know. P3*  
9

10  
11 More positively, others described being referred by their GP to specialist drug and alcohol services, and these were  
12 associated most often with those taking considerably higher doses of medicine and occurred also from self-referrals  
13 and court orders. The overwhelming experience for all participants was that such services were not set-up to  
14 accommodate those with OTC addiction and several factors were evident. The mixing of clients with different  
15 addictions was considered a problem, and there was a perception that staff viewed OTC addiction as a lesser  
16 problem, and also lacked experience:  
17  
18  
19  
20  
21

22 *'I have got a problem with being addicted to co-codamol'. They thought I was being a bit stupid. I*  
23  
24 *think they thought that you know that I should just withdraw slowly. P13*  
25  
26  
27  
28

29 Treatment options *qua* medicines were also viewed problematically, mainly due to their association with illicit drug  
30 treatment or having supervised consumption:  
31  
32

33 *I was turning up to [local] drug unit for my daily dose of methadone as though I was a heroin*  
34  
35 *addict [...] At that stage, I didn't think that methadone was appropriate. P22*  
36  
37  
38

39 However, the accounts provided suggested that such services, and the use of buprenorphine and methadone, often  
40 led to positive outcomes – either on maintenance doses or opiate free - even if concerns were initially apparent about  
41 such treatments being inappropriate and suited only for illicit substance misusers.  
42  
43  
44

45  
46 Self-treatment was often something considered as a first stage, when awareness of a problem had occurred, but it  
47 was also attempted as a response to guidance and support from internet support groups. Participants described either  
48 stopping completely or reducing the dose gradually:  
49  
50

51 *I went cold turkey as they say. I was on my own in our place [...] and I decided that I'd had*  
52  
53 *enough of basically the rounds of going to the doctors and getting the stuff, having problems*  
54  
55 *maybe getting the stuff and then going to different chemists. P14*  
56  
57  
58  
59  
60

1  
2  
3 The two on-line support groups – Overcount and Codeinefree - appeared to be particularly relevant in attempts to  
4 self-treat, and appeared to have been found during general searches of the internet for information about their  
5 addiction. The two website were perhaps the most positively received of all the options available to participants  
6 based on their experiences, and provided treatment options, including specific advice with direct communication  
7 from web site staff and participants and also generic information on the web sites and from other’s posts. The web  
8 sites offered a positive confirmatory function for many, as when Michelle noted, ‘there are many more in the same  
9 boat, going through the same struggle’ although participants’ level of engagement with the sites varied considerably  
10 and whilst some continued to actively interact, other stopped after the initial confirmatory aspect.  
11  
12  
13  
14  
15  
16  
17  
18  
19  
20  
21  
22

### 23 ***Responsibility and regulation***

24  
25  
26 All participants were asked for their views on how OTC addiction could be prevented, and issues were identified in  
27 terms of the overall availability of OTC medicines, the use of information and particularly addiction warnings, and  
28 the balance between professional and personal responsibility. Of note was that most participants were in favour of  
29 the continued availability of OTC medicines with addiction potential and often blamed themselves for their  
30 situation. Convenient access to medicines was often argued to outweigh the addiction risks to a minority, and this  
31 view was advanced irrespective of the level of consumption by participants:  
32  
33  
34  
35  
36  
37  
38

39 *Everyone should have a choice what they do with their life - as long as they have the awareness of*  
40 *the danger then it's up to each individual what they do with that information and what path they*  
41 *choose. P25*  
42  
43  
44  
45

46 Analogies were drawn by several to the current availability of other substances that can cause addiction, like tobacco  
47 and alcohol, and that their continued availability supported the availability of OTC medicines. A minority felt that  
48 the need to avoid harm was paramount and advocated prescription-only availability, although recognising that this  
49 may increase doctors’ workloads and NHS costs. The addition of addiction warnings to packets was considered  
50 relevant to those not already addicted:  
51  
52  
53  
54  
55

56 *So I mean it is better than nothing certainly to have a warning on the packet [...] and it will put*  
57  
58  
59  
60

1  
2  
3 *some people off, but the people who need to be put off, I am not sure it would.* P14  
4  
5

6 There was little awareness of regulatory changes relating to pack sizes in the UK, but a view that, like warnings,  
7 these changes may have some benefit, but only to those who did not already have a problem.  
8  
9

10  
11 Participants spontaneously raised the issues of responsibility and most felt that they were responsible as individuals,  
12 and had decided to use the medicine and should have noticed changes in use. This was often linked to assertions by  
13 participant that they were intelligent and a recurrent theme was the claim that they were controlled individuals,  
14 often with successful jobs and graduate and post-graduate university qualifications, and for whom OTC addiction  
15 was in some respects atypical:  
16  
17  
18  
19

20  
21  
22 *You know I am not an unintelligent fellow and I have got access to the internet like everybody else.*

23  
24 *I knew what the consequences were, but I still couldn't stop it.* P14  
25  
26

27 Whilst other factors may have been contributory for a minority – such as pharmacies who continued to supply, or a  
28 GP who prescribed inappropriately in one case, or post-operative care which did not address analgesic needs – it was  
29 ultimately considered a personal cause and resultant problem.  
30  
31  
32  
33  
34  
35  
36

## 37 **Discussion**

### 38 *Main Findings, Strengths and Weaknesses*

39  
40  
41  
42 The main findings of this study are that OTC medicine addiction arises from often genuine medical reasons linked to  
43 prescribing rather than experimentation, and that obtaining medicines appeared unproblematic and treatment options  
44 vary in perceived suitability and success. A strength of the study was the use of sampling via internet support groups  
45 that enabled recruitment of a recognised hard to reach group and to allow them to present their experiences in depth  
46 in a qualitative empirical study. A related study limitation was that the sample reflected only those individuals who  
47 had internet access and already recognised they had a problem. Only UK perspectives were presented, although the  
48 range of medicines, pharmacy-based supplies and regulations in the UK are broadly similar to those found in many  
49 other countries across Europe and also Australia.  
50  
51  
52  
53  
54  
55  
56  
57  
58  
59  
60

### *Relevance to Existing Literature and Implications of Results*

The study provides further evidence that several medicines – opiates, stimulants and sedatives [7, 8]– are implicated in OTC medicine abuse and whilst illustrating the primacy of codeine as a concern, also highlights that other medicines are abused for non-therapeutic effects. It also indicates that problems can occur in a range of doses, and supports previous research in Australia [17] that found both high and low dose dependency although there was less evidence of experimental or recreational use in the present study. The findings suggest there is a need to raise awareness about the possibility of OTC medicine addiction, both for prevention and also treatment and support. Whilst previous research has suggested awareness amongst the public about the abuse potential of medicines, this may reflect terminological confusion over misuse rather than addiction potential [15] and so alerting the public to the potential for addiction is necessary, such as through warnings on packets. Also alerting doctors who prescribe medicines initially is important, since this study suggests that the cessation of prescribed medicines or more complex patterns of concomitant use of prescribed and OTC medicines may be associated with OTC medicine addiction. This, again, reflected often genuine reasons for initial OTC medicine use rather than intentional experimentation. Research has suggested a high level of awareness of OTC medicine abuse potential amongst GPs but also the need for more training [19] and this may be necessary given other concerns that doctors seldom question patient's self-treatment and use of OTC medicines.[20] Raising awareness of the distinct nature and concerns of this group is also needed for other health-care professionals, such as those in addiction services, given concerns in this study, and the literature [14] as to the appropriateness of some services. This also applies to pharmacists and particularly since research suggests that they may experience uncertainty about how to support those affected [16] and it is also of note that pharmacists were not referred to in relation to treatment or support in the present study, reflecting previous omissions in the literature.[5]

### *Emerging Problems for Practice*

The results of this study reveal a number of tensions that may be problematic in supporting those affected and preventing addiction to medicine. The first involves reconciling individuals' self-perception of addiction and the need for associated support with doses taken since of the three types of consumption identified, those never

1  
2  
3 exceeding the maximum dose, for example, may have a much lower risk of harm and existing opiate addiction  
4 treatments may be clinically inappropriate. This is not to suggest that there are not genuine problems in all three  
5 types of consumption identified, and the qualitative nature of this study has revealed detailed accounts of a range of  
6 negative experiences of OTC addiction, with issues of shame and adverse effects on health, work and relationships,  
7 for example, which are recognised in the wider addiction literature.[21] Sub-therapeutic dependence has also  
8 emerged in other OTC medicine research [17] but such use may arguably also be related more to a perceived loss of  
9 control than to therapeutic dependency.[17. 22] A further and related tension arises in the influence of the internet  
10 support groups, and whilst being viewed positively overall and offering important support and treatment advice, this  
11 study suggests that they may contribute to a perception in some individuals that they are addicted, even at low doses.  
12 This potential widening of the types of addiction in society is an increasing concern [23] and one which may also  
13 threaten the previous aim of raising awareness amongst doctors, since this may suggest a wider range of affected  
14 patients than might actually require identification and referral for treatment.  
15  
16  
17  
18  
19  
20  
21  
22  
23  
24  
25  
26  
27

28 A tension also arises in participants' perception that they are different from those with other addictions and that  
29 treatments are not appropriate, and trying to reconcile this with participants' insight that they have a problem and  
30 that existing treatments appear to be effective in some cases. This will require a consideration about how such  
31 treatments and services are presented and communicated to individuals, in a way that recognises participants'  
32 anxieties about reporting in medical records and keeping their addiction hidden. There are parallels in this respect  
33 with addiction to prescribed medicines and of how to support those affected by these too. A final tension centres on  
34 making OTC medicines of potential abuse available to the public – which almost all participants supported – whilst  
35 recognising the potential harms for some individuals. This confirms the important of choice and recognition  
36 moreover of a public who '*want autonomy and freedom to choose such medicines.*' [24]  
37  
38  
39  
40  
41  
42  
43  
44  
45  
46  
47  
48  
49

## 50 **Conclusions**

51  
52 A range of problems have emerged from individuals who experienced addiction to OTC medicines, with distinct  
53 dose ranges emerging through often genuine initial reasons for use, via often unproblematic supplies from  
54 pharmacies and occasionally the internet, with medical prescribing being associated in many cases. Current  
55  
56  
57  
58  
59  
60

1  
2  
3 treatment and support was not perceived appropriate, and those affected considered themselves different to others  
4  
5 with addiction problems. Raising awareness about OTC medicine addiction is needed for the public and also health  
6  
7 care professionals, and providing and communicating treatment options that are sensitive to those affected is needed.  
8  
9  
10

11  
12  
13 **Acknowledgements** Thanks to all the participants in the study  
14

15  
16 **Funding** This work was supported by a Pharmacy Practice Research Trust Grant  
17

18  
19 **Competing Interests** None  
20

21  
22 **Participant Consent** Obtained  
23

24  
25 **Ethics Approval** University ethical approval obtained  
26

27  
28 **Data Sharing Statement** Anonymised copies of interview transcripts may be obtained upon request from  
29  
30 [richard.cooper@sheffield.ac.uk](mailto:richard.cooper@sheffield.ac.uk) although consent was not obtained from participants for further research use of data.  
31

## 32 33 **References**

- 34  
35  
36 1 Bissell P, Ward PR, Noyce PR. The Dependent Consumer: Reflections on Accounts of the Risks of Non-  
37 Prescription Medicines. *Health*: 2001; **5(1)**: 5-30.  
38  
39 2 Roumie CL, Griffin MR. Over the counter analgesics in older adults: a call for improved labelling and  
40 consumer education. *Drugs and Aging* 2004; **21(8)**: 485-498.  
41  
42 3 Bessell TL. Surfing, self-medicating and safety: buying non-prescription and complementary medicines via  
43 the internet. *Quality and Safety in Health Care* 2003; **12(2)**: 88-92.  
44  
45 4 Bond CM, Bradley C. Over the Counter Drugs: The interface between the community pharmacist and  
46 patients. *British Medical Journal* 1996; **312(7033)**: 758-760.  
47  
48 5 Reay G. *All-Party Parliamentary Drugs Misuse Group. An Inquiry into Physical Dependence and*  
49 *Addiction to Prescription and Over-the-Counter Medication*. 2009, London  
50  
51 6 Royal College of General Practitioners *Addiction to Medicines Consensus Statement January 2013* 2013  
52 London: RCGP  
53  
54 7 Cooper RJ Over-the-Counter Medicine Abuse: A Review of the Literature. *Journal of Substance Use* 2011  
55 [on-line October 3, 2011 doi 10.3109/14659891.2011.615002]  
56  
57 8 Lessenger JE, Feinberg SD. Abuse of prescription and over-the-counter medications. *Journal of the*  
58  
59  
60



- 1  
2  
3  
4  
5  
6  
7  
8  
9  
10  
11  
12  
13  
14  
15  
16  
17  
18  
19  
20  
21  
22  
23  
24  
25  
26  
27  
28  
29  
30  
31  
32  
33  
34  
35  
36  
37  
38  
39  
40  
41  
42  
43  
44  
45  
46  
47  
48  
49  
50  
51  
52  
53  
54  
55  
56  
57  
58  
59  
60
- American Board of Family Medicine* 2008; **1(1)**: 45-54.
- 9 Frei MY, Nielsen S, Dobbin M, Tobin CL. Serious morbidity associated with misuse of over-the-counter codeine-ibuprofen analgesics: A series of 27 cases. *Medical Journal of Australia* 2011; **193(5)**, : 294–296.
- 10 Medicines and Healthcare products Regulatory Agency. *MHRA Public Assessment Report. Codeine and dihydrocodeine-containing medicines: minimising the risk of addiction*. 2009. London, MHRA.
- 11 Steinman K. High school students' misuse of over-the-counter drugs: A population-based study in an urban county. *Journal of Adolescent Health* 2006; **38(4)**: 445–447.
- 12 Agaba EI, Agaba PA, Wigwe CM. Use and abuse of analgesics in Nigeria: a community survey. *Nigerian Journal of Medicine*. 2004; **13(4)**: 379-82.
- 13 Akram G. Over-the-counter medication: an emerging and neglected drug abuse? *Journal of Substance Use* 2000; 5(2): 136-142.
- 14 National Treatment Agency. *Addiction to medicine: an investigation into the configuration and commissioning of treatment services to support those who develop problems with prescription-only or over-the-counter medicine*. London 2010
- 15 Matheson C. Misuse of over-the-counter medicines from community pharmacies: a population survey of Scottish pharmacies. *Pharmaceutical Journal*. 2002. 269, 66–68.
- 16 Cooper RJ Surveillance and uncertainty: community pharmacy responses to over the counter medicine abuse Health and Social Care in the Community 2013;doi: 10.1111/hsc.12012 (published early online 16 Jan 2013)
- 17 Nielsen S, Cameron J, Pahoki, S. *Over the Counter Codeine Dependence Final Report 2010*. 2010. Victoria: Turning Point.
- 18 Wazaify M., Shields E, Hughes C.M, McElnay JC. Societal perspectives on over-the-counter (OTC) medicines. *Family Practice* 2005;**22**:170-1.
- 19 Hughes GF, Bell HM, McElnay JC. General practitioners' awareness of the appropriate and inappropriate use of over-the-counter products. *Pharmaceutical Journal* 1999; **263(7063)**:R29
- 20 Britten N. *Medicines and Society Patients, Professionals and the Dominance of Pharmaceuticals*. 2008 Basingstoke: Palgrave Macmillan.
- 21 O'Connor L, Berry JW, Inaba D, Weiss J, Morrison A. Shame, guilt, and depression in men and women in recovery from addiction. *Journal of Substance Abuse Treatment* 1994; **11(6)**: 503-510.
- 22 Reith G Consumption and its discontents: addiction, identity and the problems of freedom. *The British Journal of Sociology* 2004; **55(2)**: 283-300.2
- 23 Hacking I. Making Up People. In T. C. Heller & M. Sosna, eds. *Reconstructing Individualism: Autonomy, Individuality, and the Self in Western Thought*. 1987. Stanford: Stanford University Press, pp. 222-236..
- 24 Hanna L, Hughes C. Public's views on making decisions about over-the-counter medication and their attitudes towards evidence of effectiveness: a cross-sectional questionnaire study. *Patient Education and Counselling* 2011; **83(3)**: 345–351.

| Participant number | Sex | Age           | Employment                      | Product                                            | Dose(s) used and typology*                | Current use? | Treatment(s) & support used     |
|--------------------|-----|---------------|---------------------------------|----------------------------------------------------|-------------------------------------------|--------------|---------------------------------|
| 1                  | F   | 40s           | Housewife                       | Solpadeine + diverted Solpadol                     | Varied, up to 12-13/day II                | No           | 'Cold turkey', CF web site      |
| 2                  | F   | 60s           | Professional                    | Nurofen Plus                                       | No more than 6/day I                      | No           | CF                              |
| 3                  | M   | 40s           | Unemployed                      | Paramol +Sudafed for short period +alcohol         | Up to 36/day either 16+16 or 12+12+12 III | No           | GP, DAAT (methadone), Overcount |
| 4                  | M   | Not disclosed | Professional                    | Co-codamol, then Syndol                            | Up to 8 per day I                         | Yes          | GP, CF                          |
| 5                  | M   | 30s           | Professional                    | Co-codamol                                         | 12-14/day II                              | Yes          | CF                              |
| 6                  | M   | 30s           | Professional self-employed      | Nurofen Plus + prev. non-opiate illicit substances | Max of 60 tablets/ day III                | No           | GP, DAAT (Buprenorphine) CF     |
| 7                  | F   | Not disclosed | Former health care professional | Solpadeine                                         | Up to 8/day I                             | No           | CF                              |
| 8                  | F   | Not disclosed |                                 | Co-codamol soluble +Rx co-codamol 30/500           | Up to 16/day (max 4/dose) II              | No           | CFM                             |
| 9                  | F   | Not disclosed | Health care professional        | Nurofen Plus                                       | 32/day (very occ. 64/day) III             | No           | CF + buprenorphine              |
| 10                 | F   | 30s           | Uni student                     | Feminax then Cuprofen Plus prev. alcohol           | 36/day III                                | Yes          | CF                              |
| 11                 | F   | 40s           | professional                    | Nurofen Plus                                       | 24/day III                                | No           | CF                              |
| 12                 | F   | 20s           | Professional                    | Co-codamol + prescribed                            | Up to 8/day I                             | No           | CF                              |
| 13                 | F   | Not disclosed | Professional                    | Co-codamol + prescribed                            | up to 16/day occasionally + prescribed II | Yes          | GP, Overcount                   |
| 14                 | M   | 50s           | Retired Professional            | Nurofen Plus + prescribed codeine phosphate        | 10/day Nurofen plus + MDD of codeine III  | No           | Overcount                       |
| 15                 | M   | 60s           | Professional                    | Solpadeine soluble                                 | very occasionally 10/day II               | No           | Private treatment               |
| 16                 | M   | Not           | Professional                    | Phensedyl                                          | 90                                        | No           | GP, DAAT                        |

|    |   |               |                                 |                                                                      |                                                               |               |                              |
|----|---|---------------|---------------------------------|----------------------------------------------------------------------|---------------------------------------------------------------|---------------|------------------------------|
|    |   | disclosed     |                                 |                                                                      | bottles/week<br>III                                           |               |                              |
| 17 | M | Not disclosed | Professional                    | Panadol Ultra and Nurofen Plus                                       | 15-20 of each<br>III                                          | No            | GP                           |
| 18 | M | Not disclosed | Not disclosed                   | Solpadeine                                                           | 4/day<br>I                                                    | No            | Overcount                    |
| 19 | M | Not disclosed | Self-employed                   | Nurofen Plus                                                         | 10/day<br>II                                                  | Yes           | CF, DAAT, GP                 |
| 20 | F | Not disclosed | Not disclosed                   | Solpadeine                                                           | Up to 8/day<br>I                                              | Yes           | Overcount                    |
| 21 | F | Not disclosed | Not disclosed                   | Syndol                                                               | Up to 8/day<br>I                                              | Yes           | CF, GP                       |
| 22 | M | Not disclosed | Former health care professional | Codeine linctus, Gees linctus, stolen dihydrocodiene                 | Varied but much above max daily dose. III                     | No            | CF + DAAT (methadone)        |
| 23 | M | 60s           | Retired professional            | Phensedyl, Actifed, Codeine linctus<br>Diverted prescription codeine | 200ml codeine linctus/day<br>III                              | no            | CF + GP + DAAT (methadone)   |
| 24 | F | 30s           | Professional                    | Syndol + Nytol                                                       | Syndol: prev. up to 8/day, now 12/day in last 12 months<br>II | Yes<br>Syndol | Overcount                    |
| 25 | F | 50s           | Professional                    | Feminax, then Veganin                                                | 6-10/day.<br>Max=12/day<br>II                                 | Yes           | Overcount + GP + Drug Action |

## Key

I = consuming less than maximum recommended dose

II = consuming slightly higher than maximum recommended doses

III = consuming significantly higher than maximum recommended doses

GP = general practitioner (doctor)

DAAT = Drug and alcohol treatment

CF = CodeineFree (internet support)

Overcount = Internet support

M = male

F = female

Table 1 – Participant Details

|    |                                                                                                         |
|----|---------------------------------------------------------------------------------------------------------|
| 1  |                                                                                                         |
| 2  |                                                                                                         |
| 3  |                                                                                                         |
| 4  | Many participants, and especially those taking higher doses, varied where they made purchases           |
| 5  |                                                                                                         |
| 6  | A number of different pharmacies were often located in close proximity to participants                  |
| 7  |                                                                                                         |
| 8  | Pharmacy staff often asked questions but seldom challenged participants.                                |
| 9  |                                                                                                         |
| 10 | Participants provided responses to pharmacy staff questions that would not lead to challenges           |
| 11 |                                                                                                         |
| 12 | Occasional references were made to pharmacies that sold multiple packs.                                 |
| 13 |                                                                                                         |
| 14 | Participants, such as those taking doses less than the maximum, did not need to visit pharmacies often. |
| 15 |                                                                                                         |

16 Table two – Reasons why pharmacy purchases were considered unproblematic

17  
18  
19  
20  
21  
22  
23  
24  
25  
26  
27  
28  
29  
30  
31  
32  
33  
34  
35  
36  
37  
38  
39  
40  
41  
42  
43  
44  
45  
46  
47  
48  
49  
50  
51  
52  
53  
54  
55  
56  
57  
58  
59  
60

For peer review only

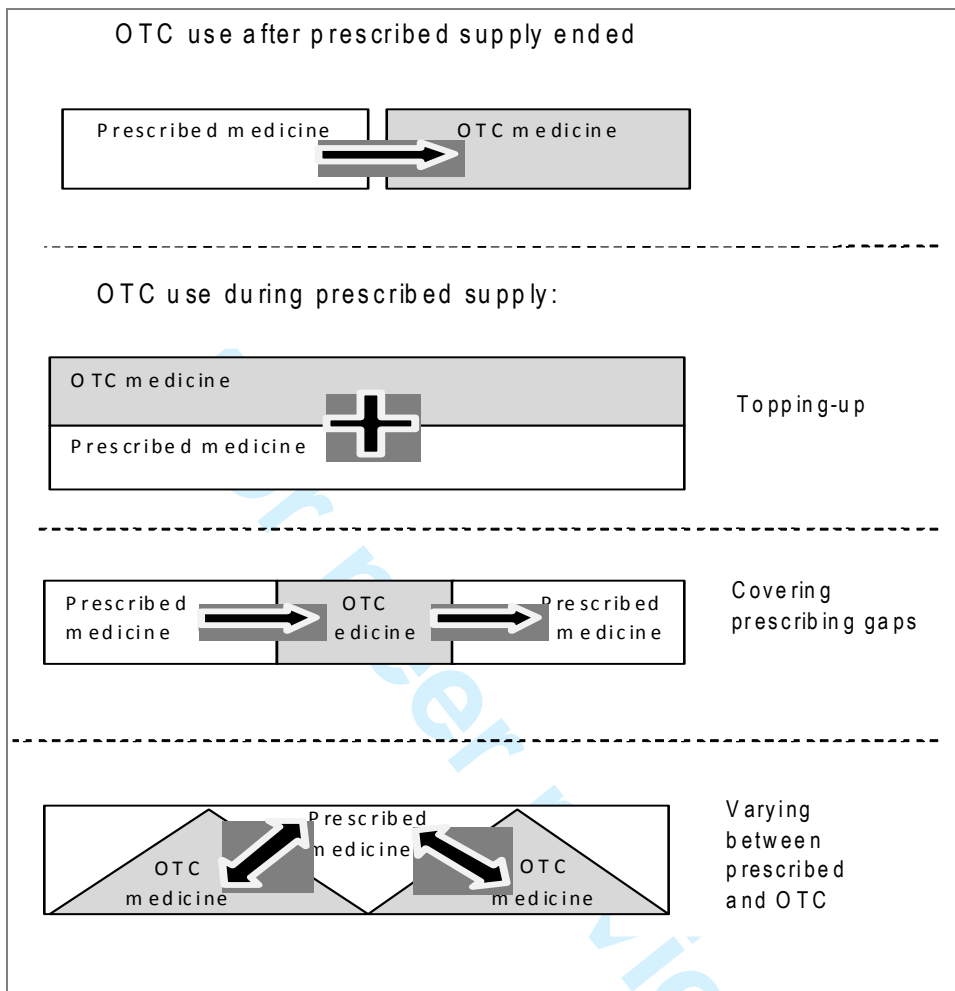

Figure one – relationship between OTC medicine use and prescribed medicines

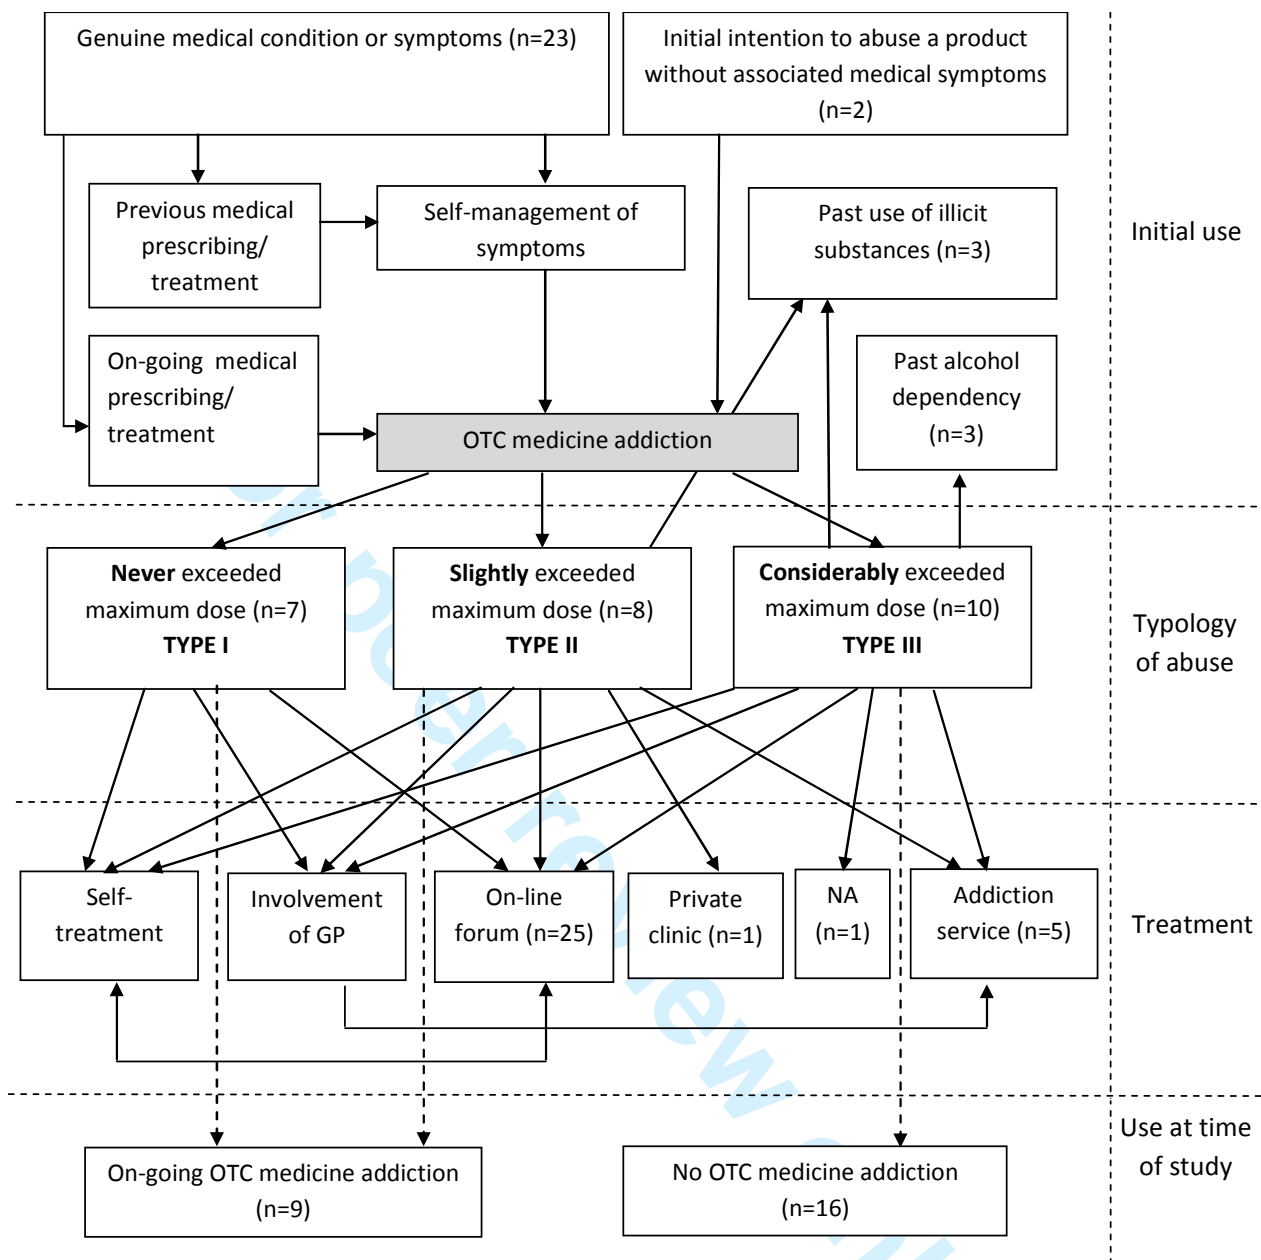

Figure Two – Summary of different initial use, types of use and treatment

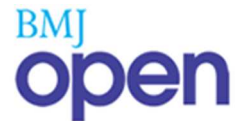

**'I Can't be an Addict. I am.' Over-the-Counter Medicine  
Addiction – a Qualitative Study**

|                                 |                                                                   |
|---------------------------------|-------------------------------------------------------------------|
| Journal:                        | <i>BMJ Open</i>                                                   |
| Manuscript ID:                  | bmjopen-2013-002913.R1                                            |
| Article Type:                   | Research                                                          |
| Date Submitted by the Author:   | 19-Apr-2013                                                       |
| Complete List of Authors:       | Cooper, Richard; University of Sheffield, SCHARR                  |
| <b>Primary Subject Heading</b>: | Addiction                                                         |
| Secondary Subject Heading:      | Qualitative research                                              |
| Keywords:                       | QUALITATIVE RESEARCH, Substance misuse < PSYCHIATRY, PRIMARY CARE |
|                                 |                                                                   |

SCHOLARONE™  
Manuscripts

Peer Review Only

## 'I Can't be an Addict. I am.' Over-the-Counter Medicine Addiction – a Qualitative Study

### Abstract

**Objectives** - Over-the-counter (OTC) pharmacy medicines are considered relatively safe in contrast to prescribed and illicit substances but their addiction potential is increasingly recognised. Those affected represent a hard to reach group and little is known about their experiences. Study objectives were to describe the experiences and views of those affected by OTC medicine addiction, particularly in relation to why medicines were taken, how they were obtained, and associated treatment and support sought.

**Design** – Qualitative study using in-depth mainly telephone interviews.

**Participants** – A purposive sample of 25 adults, aged 20-60s, 13 female.

**Setting** – United Kingdom, via two internet support groups.

**Results** – Individuals considered themselves socially and economically active and different from illicit substance misusers and blamed themselves for losing control over their medicine use. This began usually for genuine medical reasons and not experimentation and was often linked to the cessation of, or ongoing, medical prescribing. Codeine, in compound analgesics, was the main medicine implicated with three distinct dose ranges emerging, with decongestant and sedative antihistamine abuse also being reported. Subsequent use was for the 'buzz' or similar effects of the opiate, which was obtained unproblematically by having lists of pharmacies to visit and occasionally using internet suppliers. Perceived withdrawal symptoms were described for all three dose ranges, and work and health problems were reported with higher doses. Mixed views about different treatment and support options emerged, with standard drug treatment services being considered inappropriate for OTC medicines and concerns that this 'hidden addiction' was recorded formally in medical notes. Most supported the continued availability of OTC medicines with appropriate addiction warnings.

**Conclusions** - Greater awareness of the addiction potential of OTC medicines is needed for the public, pharmacists and medical prescribers, along with appropriate communication about, and reviews of, treatment and support



1  
2  
3 options, for this distinct addiction group.  
4  
5

#### 6 **Article Focus**

- 7
- 8
- 9 • Over-the-counter medicines are increasingly recognised as having addiction potential.
- 10
- 11
- 12 • To describe the experiences and views of individuals self-reporting addiction to over-the-counter medicines
- 13
- 14

#### 15 **Key Messages**

- 16
- 17
- 18 • Self-reported addiction to over-the-counter medicines was associated with genuine medical reasons initially
- 19 and linked to medical prescribing.
- 20
- 21
- 22
- 23 • Codeine is main medicine abused for non-therapeutic effects in distinct dose ranges, but other medicines
- 24 also identified.
- 25
- 26
- 27
- 28 • Current treatment may not be appropriate, based on hidden nature of over-the counter addiction and
- 29 perceived differences to other forms of addiction.
- 30
- 31
- 32
- 33
- 34
- 35
- 36

#### 37 **Strengths and Weaknesses**

- 38
- 39 • First qualitative study to explore variety of over-the-counter addictions and associated reasons and
- 40 treatment, in a recognised hard to reach group.
- 41
- 42
- 43
- 44 • Recruitment via internet support groups reflects only those with internet access and those who have
- 45 identified themselves already as having an addiction problem.
- 46
- 47
- 48
- 49
- 50
- 51
- 52
- 53
- 54
- 55
- 56
- 57
- 58
- 59
- 60

## Introduction

In contrast to prescribed and illicit drugs, those available for individuals to purchase legally without prescription have often been perceived by the public to be relatively safe.[1, 2] Such non-prescription, or over-the-counter (OTC) medicines as they are also known, are typically those purchased from non-medical outlets such as pharmacies and increasingly the internet [3] and have enabled individuals to be active participants in their own health.[4] There has been increasing concern, however, about the potential for OTC medicines to cause harm, as a recent All Party Parliamentary report [5], and a joint consensus statement [6] on addiction to medicines in the United Kingdom (UK) illustrate. Implicated medicines and therapeutic groups include stimulants, laxatives, sedatives, disassociative substances and opiate-containing medicines such as codeine.[7, 8] There has been increased reporting of harms associated with codeine addiction and particularly from side effects of additional ingredients, such as ibuprofen and paracetamol which have led to fatalities.[7, 9] These have resulted in regulatory changes in countries such as the UK [10] and Australia involving restricted indications and addiction warnings on codeine-containing analgesic packets.

Despite these emerging concerns, the scale of the problem remains uncertain and very little is known about the characteristics and particularly the experiences of those affected [7, 11]. Empirical quantitative studies have provided some evidence suggesting a diverse group of individuals may be affected, ranging from adolescents experimenting with cough medicines in the USA,[12] to older individuals abusing analgesics in Nigeria,[13] and abuse of codeine-containing medicines and sedatives involving *'middle-aged females'* in the UK. [14, 15] Such individuals have been recognised as a hard to reach group [5] and this has resulted in indirect attempts to describe those affected, such as seeking pharmacists' proxy views of those affected through surveys. [7, 16] This paper describes the findings of a study that sought to explore the views and experiences of individuals who considered themselves affected by OTC medicine addiction in the UK, to understand how it arose, what medicines were implicated and how they were obtained, and what forms of treatment and support were used.

## Methods

A qualitative methodology – neglected to date in this area - was adopted for this study, which represented part of a

1  
2  
3 larger overall study that included stakeholders and pharmacy staff [17] - using semi-structured in-depth mainly  
4 telephone interviews. Purposive sampling was used, based on a review of the literature,[7] to ensure that a range of  
5 ages, gender, medicines used, reasons for initial use (genuine or experimental) and treatment and support options  
6 were represented. Individuals describing only prescribed medicines were excluded and since the aim was to capture  
7 self-perception of OTC medicine addiction, a dependency screening measure was not considered appropriate.[18]  
8 Recruitment was undertaken via two internet-based support groups for those affected - 'Overcount' and  
9 'Codeinefree'. A total of twenty five interviews were undertaken (see table one) over an 18 month period between  
10 2009 and 2010, reflecting a slow uptake to participate. This was considered to be related to the hard to reach nature  
11 of this group, and prospective participants often made initial contact to discuss provisions for remaining anonymous  
12 in the study. The final sample size was determined by theoretical saturation being achieved in emergent themes. An  
13 interview schedule was developed based on a review of the literature [7] and since recruitment occurred both before  
14 and after addiction warnings were introduced in the UK, participants were either asked for their views about  
15 warnings in general, or their experiences or views of the actual change respectively.[10] Interviews were conducted  
16 by telephone in all but two cases, and were digitally audio recorded and then fully transcribed and anonymised.  
17 Analysis of transcripts involved an initial process of open coding, which was also informed by the themes from the  
18 available literature [7] and the interview schedule. Axial coding between participant transcripts was then undertaken  
19 using the constant comparison process which involved reading and re-reading transcripts, to identify links between  
20 emerging codes and participants and their characteristics. A final process of further refining of themes was  
21 undertaken until these provided explanatory accounts of the data. University ethical approval was obtained.  
22  
23  
24  
25  
26  
27  
28  
29  
30  
31  
32  
33  
34  
35  
36  
37  
38  
39  
40  
41  
42  
43  
44

## 45 **Results**

46  
47 Analysis of interviews revealed three broad, chronological themes: initial use of the medicine, often linked to  
48 genuine medical reasons; awareness of a problem with the medicine over time, with three distinct groups of dose  
49 levels being apparent, and finally attempts to seek treatment and help, which were associated with varying degrees  
50 of success. All participants described having a problem with an opiate (codeine and occasionally dihydrocodeine),  
51 although the stimulant decongestant pseudoephedrine and sedative antihistamines in sleeping medicines or cold  
52 remedies were also referred to by some. However, spanning these themes was also a dominant concern relating to  
53  
54  
55  
56  
57  
58  
59  
60

1  
2  
3 the hidden nature of OTC medicine addiction and of participant's presentation of themselves as being normal and  
4 distinct from those with other, illicit addictions. This theme will be described along with other themes related to the  
5 unproblematic nature of obtaining medicines and views about regulation and responsibility.  
6  
7  
8

### 9 10 *Initial use of OTC medicines*

11  
12  
13 Genuine medical reasons were almost always associated with the initial use of an OTC medicine and due to the  
14 involvement of codeine for almost all of these patients, there was a not unexpected range of pain-related symptoms  
15 or conditions, including headaches and migraine, abdominal and period pain, and hangover treatments. Of note was  
16 that there was often an association with medically prescribed medicines, either through initial prescribing that had  
17 then stopped or on-going prescribing (figure one):  
18  
19  
20  
21  
22

23  
24 *I mean my story started by being on painkillers for gynaecological problems and that was when I*  
25 *first took codeine [...] Then I found when I couldn't get codeine on prescription any longer it was*  
26 *readily available over the counter. P9*  
27  
28  
29  
30

31  
32 Participants using both prescribed and OTC medicines described either using OTC medicines to cover gaps before a  
33 new prescription started, or to allow the strength of medicine used to be varied. In contrast, two participants  
34 described intentionally experimenting with an OTC medicine – pseudoephedrine and codeine - having been told  
35 about their abuse potential by others (see figure two).  
36  
37  
38

39  
40 For all those participants who described a genuine initial use of a product, this led eventually to the medicine being  
41 taken for different reasons. The key reason cited related to codeine and whilst the effect varied, common phrases  
42 used were the 'buzz' or 'calm' associated with its use, although exploiting sedative side effects were also reported  
43 by some:  
44  
45  
46  
47

48  
49 *I remember when I took them that it would give you a lift and a buzz, but that lift or buzz would go*  
50 *and the only way to sustain that is to take more. P11*  
51  
52

53  
54 Pseudoephedrine was associated with its stimulant-related side effects and antihistamines like diphenhydramine  
55 were used to promote sleep. Participants reflected that abused medicines and particularly codeine allowed them to  
56 cope, particularly with significant life events such as bereavements, work or relationship problems.  
57  
58  
59  
60

### ***Obtaining Medicines***

Participants all described the use of pharmacies to obtain supplies and two also described using internet pharmacies. A key feature of both was how unproblematic it was to obtain medicines, with policies to restrict supplies being perceived to be ineffective, and some pharmacies were considered easier than others to obtain supplies (table two). Avoiding detection was a key concern for individuals, who described intentionally varying the pharmacy used, using 'schedules, 'tables' or 'lists' of those visited, and lying and fabricating responses to questions from staff:

*I had to go to different pharmacies and I didn't want to get knocked back. I would go in and I would make out that I had a toothache, so I didn't know the best thing. I wouldn't directly ask for the product, because I know that was suspicious. P10*

Most participants did recall isolated and uncomfortable instances of being challenged; in some cases resulting in avoiding that pharmacy or visiting less:

*I've only ever been challenged once and it was quite a confrontational challenge and...but that was back in the days when I was taking eight a day and [...] that one experience kind of altered how I did things. I started pharmacy shopping, I started varying where I went and I started to notice you know the shop workers' routines. P18*

However, several participants considered these challenges to have influenced their attempts to seek help:

*I knew it would come sometime but you know to actually face it, that she had actually confronted me with it and that was really a wakeup call for me. P19*

Internet pharmacy purchases were mentioned by two participants, who reported being able to obtain multiple quantities repeatedly. Although policies varied between suppliers, questionnaires or identification checks were recognized as being mechanisms that were intended to limit supplies, but which could be easily circumvented. Other participants were cautious of internet medicine supplies and expressed concerns about the lack of safety of such supplies.

### *Awareness of a problem*

The second key chronological theme involved participants becoming aware of having a problem. Strikingly, the words ‘addiction’ or ‘addicted’ were frequently spontaneously used by participants to describe themselves and their situation. Awareness of a problem centred mainly on perceived withdrawal symptoms, although awareness of prolonged consumption over time, critical incidents and a perceived loss of control generally were also identified. Anxiety, generalized pain or headache and gastro-intestinal problems were variously described and attributed to the medicine having been stopped:

*Yeah I am an addict, no doubt about it. As much as a heroin addict, yeah. Shameful and it makes you feel dirty and guilty, but I was an addict, yeah. Well I have stopped taking codeine before and for the past few days I have had cold sweats and had palpitations and had withdrawal symptoms. So the physical symptoms suggest that I am addicted to it and also the psychological. P10*

Critical incidents such as rare instances of being confronted in a pharmacy, medical problem such as a gastro-intestinal bleed, or illegal activity also appeared to represent moments when participants considered themselves to have a problem. A recurrent theme involved participants’ perceived loss of control over their medicine consumption, either gradually and suddenly, and several participants expressed disbelief that addiction could have happened to them, and often drew upon professional, educational status or intelligence claims to argue that they should have had the understanding or insight to prevent this happening.

The role of the two internet support forums – particularly in postings of other individuals’ descriptions - appeared to be confirmatory of their problem and participants’ use of words like ‘addiction’ and ‘rebound headache’ appeared to have originated from here. Several argued that genetic factors –in references to family members with addictions - might explain their OTC medicine addiction, and several felt their personality and previous problems – with alcohol misuse for example – was explanatory. In these accounts, participants made explicit and sustained attempts to distinguish themselves from individuals with other addictions and particularly illicit substance users, who they viewed more negatively in both a behavioural and visual sense:

*Addicts are people on the street who haven’t got a job and I am sat here in a suit in an office, my own office with a very good career, senior manager within a very large organisation and I can’t*

1  
2  
3 *be an addict. I am.* P5  
4  
5

6 A respectable appearance, good employment status and education were often cited as reasons why participants were  
7 different, although there was also recognition that their addiction was ultimately the same.  
8  
9

### 10 11 12 13 14 ***Three types of OTC medicine abuse*** 15

16  
17 A distinction was evident between participants based upon the quantities of medicines taken, with three types  
18 emerging (figure two) which were relative to the recommended maximum doses of specific products. A first group  
19 was characterised by self-reported use that never exceeded the recommended maximum dose of a medicine. A  
20 second type involved daily doses slightly above the maximum recommended dosage and often involving  
21 paracetamol and codeine (500mg and 8mg per tablet respectively) compound analgesics formulations and this  
22 occurred sometimes due to combinations of OTC and prescribed medicines. In both these groups, there was  
23 awareness of the harms associated with the medicine, and use for non-therapeutic reasons and perceived withdrawal.  
24 Such participants often explicitly defended their addiction status, despite the relatively low doses, and appeared  
25 aware – usually from posts on internet support groups – of individuals taking much higher doses. Such higher doses  
26 represented the third type of consumption identified in this study and was characterised by doses much higher than  
27 recommended, with those describing codeine and ibuprofen (12.8mg and 200mg per tablet respectively) compound  
28 tablet use, for example, reporting daily consumption of between 32 and 64 tablets:  
29  
30  
31  
32  
33  
34  
35  
36  
37  
38  
39

40  
41  
42 *[...] I would take eight in one day. But then of course in increasing amounts. Till the point came*  
43 *that I was taking thirty two a day. Even on really bad days, I would take a second lot of thirty two.*  
44

45  
46 P9  
47

48  
49 Distinct to this group was that three participants had described criminal activity relating to their addiction –  
50 convictions for theft being mentioned in two cases – and this group alone was associated with descriptions of  
51 significant health problems, including gastric bleeding and hospitalization following organ damage; significant  
52 purchasing costs were also associated with this group. However, despite these more significant issues, this group  
53 similarly differentiated themselves from those with other forms of addiction and in two cases referred to their health-  
54  
55  
56  
57  
58  
59  
60

1  
2  
3 care professional backgrounds to support their claims.  
4  
5  
6  
7  
8

### 9 ***A 'hidden' addiction***

10  
11  
12 In describing their situations, individuals often described overt attempts to keep their problem hidden, and this  
13 occurred particularly at work where concerns about a perceived change in appearance or behaviour were thought  
14 likely to arouse suspicions amongst colleagues. Of note was that it was the change in appearance that worried  
15 participants primarily, and not being seen taking a medicine, which was considered by them to be an everyday  
16 activity which would not arouse suspicion in itself. Keeping medicine abuse hidden from family and home  
17 environments was also identified, although for a minority, friends and family were aware and had provided support.  
18 Many participants also referred to the influence of OTC abuse on their family and relationships more generally, with  
19 a tension being apparent in trying to keep OTC addiction secret but recognising the support that others could offer.  
20 For some, family and friends were viewed positively and provided support when a participant was trying to seek  
21 treatment, but in other cases much less so:  
22  
23  
24  
25  
26  
27  
28  
29  
30  
31

32  
33 *To be honest, I can't discuss it with my family. They simply wouldn't understand. It would be a*  
34 *horror for them. And they don't deal with things like that very well, at all. P6*  
35  
36  
37  
38  
39  
40

### 41 ***Treatment and support***

42  
43  
44 The third main chronological theme concerned subsequent attempts by all individuals to address their OTC medicine  
45 addiction. These varied considerably and appeared in part related to the quantities of medicine taken (table 2) and  
46 included internet support group help in all cases, as well as National Health Service (NHS) medical General  
47 Practitioner (GP) consultations, specialist NHS drug and alcohol treatment (DAAT) services, a private clinic,  
48 counselling, self-management and narcotics anonymous (see figure two). Perceived benefits of these varied, with  
49 initial self-treatment, for example, often being considered ineffective and there was a view that several services,  
50 particularly narcotics anonymous and specialist drug services, were not suited to OTC medicine addiction.  
51 Participants' need for anonymity was again evident, with concerns being expressed about addiction being recorded  
52  
53  
54  
55  
56  
57  
58  
59  
60



1  
2  
3 in medical notes and employers and others becoming aware; this extended to the intentional use of pseudonyms by  
4 participants on internet support groups. Of note was that pharmacists were not referred to at all in relation to  
5 treatment and support.  
6  
7

8  
9  
10 GP involvement led to both positive and negative comments although some participants had specifically not sought  
11 GP advice, due either to poor existing relationships or, linked to the hidden nature of this issue, concerns about their  
12 addiction being recorded. Many participants felt their doctor considered OTC medicine addiction to be less serious  
13 than other addictions and something not to be concerned about or suited to simple self-management:  
14  
15  
16

17  
18  
19 *[...] I have mentioned it to the doctor and he sort of said, 'well it's something you handle*  
20 *yourself'. At this sort of level [...]* P19  
21  
22

23  
24 Some GPs had attempted to treat, although experiences suggested this was not successful:  
25

26  
27 *[...] my GP, he tried to detox me with the dihydrocodeine [...]* *I just ended up taking the tablets*  
28 *over a week, you know, that was failure you know.* P3  
29  
30

31  
32 More positively, others described being referred by their GP to specialist drug and alcohol services, and these were  
33 associated most often with those taking considerably higher doses of medicine and occurred also from self-referrals  
34 and court orders. The overwhelming experience for all participants was that such services were not set-up to  
35 accommodate those with OTC addiction and several factors were evident. The mixing of clients with different  
36 addictions was considered a problem, and there was a perception that staff viewed OTC addiction as a lesser  
37 problem, and also lacked experience:  
38  
39  
40  
41  
42  
43

44  
45 *'I have got a problem with being addicted to co-codomol'. They thought I was being a bit stupid. I*  
46 *think they thought that you know that I should just withdraw slowly.* P13  
47  
48

49  
50 Treatment options involving specific medicines were also viewed problematically, mainly due to their association  
51 with illicit drug treatment or having supervised consumption:  
52

53  
54  
55 *I was turning up to [local] drug unit for my daily dose of methadone as though I was a heroin*  
56 *addict [...]* *At that stage, I didn't think that methadone was appropriate.* P22  
57  
58  
59  
60

1  
2  
3 However, the accounts provided from those consuming more significant amounts of opiates suggested that such  
4 services, and the use of buprenorphine and methadone, often led to positive outcomes – either on maintenance doses  
5 or opiate free - even if concerns were initially apparent about such treatments being inappropriate and suited only for  
6 illicit substance misusers.  
7  
8  
9

10  
11 Self-treatment was often something considered as a first stage, when awareness of a problem had occurred, but it  
12 was also attempted as a response to guidance and support from internet support groups. Participants described either  
13 stopping completely or reducing the dose gradually:  
14  
15  
16

17  
18  
19 *I went cold turkey as they say. I was on my own in our place [...] and I decided that I'd had*  
20 *enough of basically the rounds of going to the doctors and getting the stuff, having problems*  
21 *maybe getting the stuff and then going to different chemists. P14*  
22  
23  
24  
25

26 The two on-line support groups – Overcount and Codeinefree - appeared to be particularly relevant in attempts to  
27 self-treat, and appeared to have been found during general searches of the internet for information about their  
28 addiction. The two website were perhaps the most positively received of all the options available to participants  
29 based on their experiences, and provided treatment options, including specific advice with direct communication  
30 from web site staff and participants and also generic information on the web sites and from other's posts. The web  
31 sites offered a positive confirmatory function for many, as when one participant (P25) noted, '*there are many more*  
32 *in the same boat, going through the same struggle*' although participants' level of engagement with the sites varied  
33 considerably and whilst some continued to actively interact, other stopped after the initial confirmatory aspect.  
34  
35  
36  
37  
38  
39  
40  
41  
42  
43  
44  
45

#### 46 ***Responsibility and regulation***

47

48 All participants were asked for their views on how OTC addiction could be prevented, and issues were identified in  
49 terms of the overall availability of OTC medicines, the use of information and particularly addiction warnings, and  
50 the balance between professional and personal responsibility. Of note was that most participants were in favour of  
51 the continued availability of OTC medicines with addiction potential and often blamed themselves for their  
52 situation. Convenient access to medicines was often argued to outweigh the addiction risks to a minority, and this  
53  
54  
55  
56  
57  
58  
59  
60

1  
2  
3 view was advanced irrespective of the level of consumption by participants:  
4  
5

6 *Everyone should have a choice what they do with their life - as long as they have the awareness of*  
7 *the danger then it's up to each individual what they do with that information and what path they*  
8 *choose.* P25  
9  
10

11  
12 Analogies were drawn by several to the current availability of other substances that can cause addiction, like tobacco  
13 and alcohol, and that their continued availability supported the availability of OTC medicines. A minority felt that  
14 the need to avoid harm was paramount and advocated prescription-only availability, although recognising that this  
15 may increase doctors' workloads and NHS costs. The addition of addiction warnings to packets was considered  
16 relevant only to those not already addicted:  
17  
18  
19  
20  
21

22 *So I mean it is better than nothing certainly to have a warning on the packet [...] and it will put*  
23 *some people off, but the people who need to be put off, I am not sure it would.* P14  
24  
25  
26  
27  
28

29 This view was held by those interviewed both before and after the addiction warnings were introduced and for those  
30 still taking OTC medicines at the time of the study, there was a lack of awareness, which one participant (P5)  
31 summed up as: *'I've not noticed, but then again I'm not looking'*. There was little awareness of regulatory changes  
32 relating to pack sizes in the UK from those interviewed after the changes, but a view that, like warnings, these may  
33 have some benefit, but only to those who did not already have a problem.  
34  
35  
36  
37  
38

39 Participants spontaneously raised the issues of responsibility and most felt that they were responsible as individuals,  
40 and had decided to use the medicine and should have noticed changes in use. This was often linked to assertions by  
41 participant that they were intelligent and a recurrent theme was the claim that they were controlled individuals,  
42 often with successful jobs and graduate and post-graduate university qualifications, and for whom OTC addiction  
43 was in some respects atypical:  
44  
45  
46  
47  
48

49 *You know I am not an unintelligent fellow and I have got access to the internet like everybody else.*  
50 *I knew what the consequences were, but I still couldn't stop it.* P14  
51  
52  
53  
54

55 Whilst other factors may have been contributory for a minority – such as pharmacies who continued to supply, or a  
56 GP who prescribed inappropriately in one case, or post-operative care which did not address analgesic needs – it was  
57  
58  
59  
60

1  
2  
3 ultimately considered a personal cause and resultant problem.  
4  
5  
6  
7  
8

## 9 **Discussion**

### 10 *Main Findings, Strengths and Weaknesses*

11  
12  
13  
14  
15 The main findings of this study are that self-reported OTC medicine addiction arises from often genuine medical  
16 reasons linked to prescribing rather than experimentation, and that obtaining medicines appeared unproblematic and  
17 treatment options vary in perceived suitability and success. A strength of the study was the use of sampling via  
18 internet support groups that enabled recruitment of a recognised hard to reach group and to allow them to present  
19 their experiences in depth in a qualitative empirical study. However, related study limitations are that the sample  
20 reflected only those individuals who had internet access and already recognised they had a problem and that those  
21 who had not engaged with these support groups were not represented. In addition, the dominance of codeine  
22 amongst participants may be related to one of the internet support groups primarily supporting only those affected  
23 by opiates. Only UK perspectives were presented, although the range of medicines, pharmacy-based supplies and  
24 regulations in the UK are broadly similar to those found in many other countries across Europe and also Australia.  
25 Analysis of interviews solely by the researcher and hence without either participant or other researcher validation or  
26 coding respectively represents a further study limitation.  
27  
28  
29  
30  
31  
32  
33  
34  
35  
36  
37  
38  
39  
40  
41  
42

### 43 *Relevance to Existing Literature and Implications of Results*

44  
45  
46 The study provides further evidence that several medicines – opiates, stimulants and sedatives [7, 8] – are implicated  
47 in OTC medicine abuse and whilst illustrating the primacy of codeine as a concern, also highlights that other  
48 medicines are abused for non-therapeutic effects. It also indicates that problems can occur in a range of doses, and  
49 supports previous research in Australia [18] that found both high and low dose dependency although there was less  
50 evidence of experimental or recreational use in the present study. The findings suggest there is a need to raise  
51 awareness about the possibility of OTC medicine addiction, both for prevention and also treatment and support.  
52  
53  
54  
55  
56  
57  
58  
59  
60

1  
2  
3 may reflect terminological confusion over misuse rather than addiction potential [19] and so alerting the public to  
4 the potential for addiction is necessary, such as through warnings on packets. Also alerting doctors who prescribe  
5 medicines initially is important, since this study suggests that the cessation of prescribed medicines or more complex  
6 patterns of concomitant use of prescribed and OTC medicines may be associated with OTC medicine addiction.  
7 This, again, reflected often genuine reasons for initial OTC medicine use rather than intentional experimentation.  
8 Research has suggested a high level of awareness of OTC medicine abuse potential amongst GPs but also the need  
9 for more training [20] and this may be necessary given other concerns that doctors seldom question patient's self-  
10 treatment and use of OTC medicines.[21] Raising awareness of the distinct nature and concerns of this group is also  
11 needed for other health-care professionals, such as those in addiction services, given concerns in this study, and the  
12 literature [15] as to the appropriateness of some services. This also applies to pharmacists and particularly since  
13 research suggests that they may experience uncertainty about how to support those affected.[17] This study offers  
14 suggestions about possible questions for health-care professionals such as pharmacists and prescribers, particularly  
15 in relation to individuals experiencing more severe self-reported problems. For example, asking if individuals had  
16 ever taken more than the recommended maximum dose, if their medicine use had affected their work or social life,  
17 or if they felt they had lost control over their medicine use have all emerged from this study. However, it is also of  
18 note that pharmacists were not referred to by participants at all in relation to treatment or support in the present  
19 study, and this not only reflects previous omissions in the literature [5] but also concerns around difficulties in  
20 implementing harm-reduction strategies in this setting.[7, 11, 22]

### 21 22 23 24 25 26 27 28 29 30 31 32 33 34 35 36 37 38 39 40 41 42 43 44 45 46 47 48 49 50 51 52 53 54 55 56 57 58 59 60 *Emerging Problems for Practice*

The results of this study reveal a number of tensions that may be problematic in supporting those affected and preventing addiction to medicine. The first involves reconciling individuals' self-perception of addiction and the need for associated support with doses taken since of the three types of consumption identified, those never exceeding the maximum dose, for example, may have a much lower risk of harm and existing opiate addiction treatments may be clinically inappropriate. This is not to suggest that there are not genuine problems in all three types of consumption identified, and the qualitative nature of this study has revealed detailed accounts of a range of negative experiences of OTC addiction, with issues of shame and adverse effects on health, work and relationships, for example, which are recognised in the wider addiction literature.[23] Sub-therapeutic dependence has also

1  
2  
3 emerged in other OTC medicine research [18] but such use may arguably also be related more to a perceived loss of  
4 control than to therapeutic dependency.[18. 24] A further and related tension arises in the influence of the internet  
5 support groups, and whilst being viewed positively overall and offering important support and treatment advice, this  
6 study suggests that they may contribute to a perception in some individuals that they are addicted, even at low doses.  
7 This potential widening of the types of addiction in society is an increasing concern [25] and one which may also  
8 threaten the previous aim of raising awareness amongst doctors, since this may suggest a wider range of affected  
9 patients than might actually require identification and referral for treatment.  
10

11 A tension also arises in participants' perception that they are different from those with other addictions and that  
12 treatments are not appropriate, and trying to reconcile this with participants' insight that they have a problem and  
13 that existing treatments appear to be effective in some cases. This will require a consideration about how such  
14 treatments and services are presented and communicated to individuals, in a way that recognises participants'  
15 anxieties about reporting in medical records and keeping their addiction hidden. There are parallels in this respect  
16 with addiction to prescribed medicines and of how to support those affected by these too. A final tension centres on  
17 making OTC medicines of potential abuse available to the public – which almost all participants supported – whilst  
18 recognising the potential harms for some individuals. This confirms the important of choice and recognition  
19 moreover of a public who '*want autonomy and freedom to choose such medicines.*' [26]  
20  
21  
22  
23  
24  
25  
26  
27  
28  
29  
30  
31  
32  
33  
34  
35  
36  
37  
38  
39

## 40 **Conclusions**

41  
42 A range of problems have emerged from individuals who experienced addiction to OTC medicines, with distinct  
43 dose ranges emerging through often genuine initial reasons for use, via often unproblematic supplies from  
44 pharmacies and occasionally the internet, with medical prescribing being associated in many cases. Current  
45 treatment and support was not perceived appropriate, and those affected considered themselves different to others  
46 with addiction problems. Raising awareness about OTC medicine addiction is needed for the public and also health  
47 care professionals, and providing and communicating treatment options that are sensitive to those affected is needed.  
48  
49  
50  
51  
52  
53  
54  
55  
56  
57  
58  
59  
60

1  
2  
3 **Acknowledgements** Thanks to all the participants in the study  
4

5  
6 **Funding** This work was supported by a Pharmacy Practice Research Trust Grant  
7

8  
9 **Competing Interests** None  
10

11  
12 **Participant Consent** Obtained  
13

14  
15 **Ethics Approval** University ethical approval obtained  
16

17  
18 **Data Sharing Statement** Anonymised copies of interview transcripts may be obtained upon request from  
19 [richard.cooper@sheffield.ac.uk](mailto:richard.cooper@sheffield.ac.uk) although consent was not obtained from participants for further research use of data.  
20  
21

## 22 23 24 **References**

- 25  
26 1 Bissell P, Ward PR, Noyce PR. The Dependent Consumer: Reflections on Accounts of the Risks of Non-  
27 Prescription Medicines. *Health*: 2001; **5(1)**: 5-30.  
28  
29 2 Roumie CL, Griffin MR. Over the counter analgesics in older adults: a call for improved labelling and  
30 consumer education. *Drugs and Aging* 2004; **21(8)**: 485-498.  
31  
32 3 Bessell TL. Surfing, self-medicating and safety: buying non-prescription and complementary medicines via  
33 the internet. *Quality and Safety in Health Care* 2003; **12(2)**: 88-92.  
34  
35 4 Bond CM, Bradley C. Over the Counter Drugs: The interface between the community pharmacist and  
36 patients. *British Medical Journal* 1996; **312(7033)**: 758-760.  
37  
38 5 Reay G. *All-Party Parliamentary Drugs Misuse Group. An Inquiry into Physical Dependence and*  
39 *Addiction to Prescription and Over-the-Counter Medication*. 2009, London  
40  
41 6 Royal College of General Practitioners *Addiction to Medicines Consensus Statement January 2013* 2013  
42 London: RCGP  
43  
44 7 Cooper RJ Over-the-Counter Medicine Abuse: A Review of the Literature. *Journal of Substance Use* 2011  
45 [on-line October 3, 2011 doi 10.3109/14659891.2011.615002]  
46  
47 8 Lessenger JE, Feinberg SD. Abuse of prescription and over-the-counter medications. *Journal of the*  
48 *American Board of Family Medicine* 2008; **1(1)**: 45-54.  
49  
50 9 Frei MY, Nielsen S, Dobbin M, Tobin CL. Serious morbidity associated with misuse of over-the-counter  
51  
52  
53  
54  
55  
56  
57  
58  
59  
60

- 1  
2  
3 codeine-ibuprofen analgesics: A series of 27 cases. *Medical Journal of Australia* 2011; **193(5)**, : 294–296.  
4  
5 10 Medicines and Healthcare products Regulatory Agency. *MHRA Public Assessment Report. Codeine and*  
6  
7 *dihydrocodeine-containing medicines: minimising the risk of addiction*. 2009. London, MHRA.  
8  
9 11 Nielsen S, Cameron J, Lee N. Characteristics of a nontreatment-seeking sample of over-the-counter  
10  
11 codeine users: implications for intervention and prevention. *J Opioid Manag* 2011;7:363-70  
12  
13 12 Steinman K. High school students' misuse of over-the-counter drugs: A population-based study in an urban  
14  
15 county. *Journal of Adolescent Health* 2006; **38(4)**: 445–447.  
16  
17 13 Agaba EI, Agaba PA, Wigwe CM. Use and abuse of analgesics in Nigeria: a community survey. *Nigerian*  
18  
19 *Journal of Medicine*. 2004; **13(4)**: 379-82.  
20  
21 14 Akram G. Over-the-counter medication: an emerging and neglected drug abuse? *Journal of Substance Use*  
22  
23 2000; 5(2): 136-142.  
24  
25 15 National Treatment Agency. *Addiction to medicine: an investigation into the configuration and*  
26  
27 *commissioning of treatment services to support those who develop problems with prescription-only or over-*  
28  
29 *the-counter medicine*. London 2010  
30  
31 16 Matheson C. Misuse of over-the-counter medicines from community pharmacies: a population survey of  
32  
33 Scottish pharmacies. *Pharmaceutical Journal*. 2002. 269, 66–68.  
34  
35 17 Cooper RJ Surveillance and uncertainty: community pharmacy responses to over the counter medicine  
36  
37 abuse. *Health and Social Care in the Community* 2013;doi: 10.1111/hsc.12012 (published early online 16  
38  
39 Jan 2013)  
40  
41 18 Nielsen S, Cameron J, Pahoki, S. *Over the Counter Codeine Dependence Final Report 2010*. 2010.  
42  
43 Victoria: Turning Point.  
44  
45 19 Wazaify M., Shields E, Hughes C.M, McElnay JC. Societal perspectives on over-the-counter (OTC)  
46  
47 medicines. *Family Practice* 2005;**22**:170-1.  
48  
49 20 Hughes GF, Bell HM, McElnay JC. General practitioners' awareness of the appropriate and inappropriate  
50  
51 use of over-the-counter products. *Pharmaceutical Journal* 1999; 263(7063):R29  
52  
53 21 Britten N. *Medicines and Society Patients, Professionals and the Dominance of Pharmaceuticals*. 2008  
54  
55 Basingstoke: Palgrave Macmillan.  
56  
57  
58  
59  
60



- 1  
2  
3 22 Nielsen S, Cameron J, Pahoki S. [Opportunities and challenges: over-the-counter codeine supply from the](#)  
4 [codeine consumer's perspective](#) *International Journal of Pharmacy Practice*. 2012 Article first published  
5 online: 25 OCT 2012 DOI: 10.1111/j.2042-7174.2012.00247.x  
6  
7  
8  
9 23 O'Connor L, Berry JW, Inaba D, Weiss J, Morrison A. Shame, guilt, and depression in men and women in  
10 recovery from addiction. *Journal of Substance Abuse Treatment* 1994; **11(6)**: 503-510.  
11  
12  
13 24 Reith G Consumption and its discontents: addiction, identity and the problems of freedom. *The British*  
14 *Journal of Sociology* 2004; **55(2)**: 283-300.2  
15  
16  
17 25 Hacking I. Making Up People. In T. C. Heller & M. Sosna, eds. *Reconstructing Individualism: Autonomy,*  
18 *Individuality, and the Self in Western Thought*. 1987. Stanford: Stanford University Press, pp. 222-236..  
19  
20  
21 26 Hanna L, Hughes C. Public's views on making decisions about over-the-counter medication and their  
22 attitudes towards evidence of effectiveness: a cross-sectional questionnaire study. *Patient Education and*  
23 *Counselling* 2011; **83(3)**: 345-351.  
24  
25  
26  
27  
28  
29  
30  
31  
32  
33  
34  
35  
36  
37  
38  
39  
40  
41  
42  
43  
44  
45  
46  
47  
48  
49  
50  
51  
52  
53  
54  
55  
56  
57  
58  
59  
60

## 'I Can't be an Addict. I am.' Over-the-Counter Medicine Addiction – a Qualitative Study

### Abstract

**Objectives** - Over-the-counter (OTC) pharmacy medicines are considered relatively safe in contrast to prescribed and illicit substances but their addiction potential is increasingly recognised. Those affected represent a hard to reach group and little is known about their experiences. Study objectives were to describe the experiences and views of those affected by OTC medicine addiction, particularly in relation to why medicines were taken, how they were obtained, and associated treatment and support sought.

**Design** – Qualitative study using in-depth mainly telephone interviews.

**Participants** – A purposive sample of 25 adults, aged 20-60s, 13 female.

**Setting** – United Kingdom, via two internet support groups.

**Results** – Individuals considered themselves socially and economically active and different from illicit substance misusers and blamed themselves for losing control over their medicine use. This began usually for genuine medical reasons and not experimentation and was often linked to the cessation of, or ongoing, medical prescribing. Codeine, in compound analgesics, was the main medicine implicated with three distinct dose ranges emerging, with decongestant and sedative antihistamine abuse also being reported. Subsequent use was for the 'buzz' or similar effects of the opiate, which was obtained unproblematically by having lists of pharmacies to visit and occasionally using internet suppliers. Perceived withdrawal symptoms were described for all three dose ranges, and work and health problems were reported with higher doses. Mixed views about different treatment and support options emerged, with standard drug treatment services being considered inappropriate for OTC medicines and concerns that this 'hidden addiction' was recorded formally in medical notes. Most supported the continued availability of OTC medicines with appropriate addiction warnings.

**Conclusions** - Greater awareness of the addiction potential of OTC medicines is needed for the public, pharmacists and medical prescribers, along with appropriate communication about, and reviews of, treatment and support

Formatted: English (U.K.)

options, for this distinct addiction group.

#### Article Focus

- Over-the-counter medicines are increasingly recognised as having addiction potential.
- To describe the experiences and views of individuals self-reporting addictioned to over-the-counter medicines

#### Key Messages

- Self-reported aAddiction to over-the-counter medicines was associated with genuine medical reasons initially and linked to medical prescribing.
- Codeine is main medicine abused for non-therapeutic effects in distinct dose ranges, but other medicines also identified.
- Current treatment may not be appropriate, based on hidden nature of over-the counter addiction and perceived differences to other forms of addiction.

#### Strengths and Weaknesses

- First qualitative study to explore variety of over-the-counter addictions and associated reasons and treatment, in a recognised hard to reach group.
- Recruitment via internet support groups reflects only those with internet access and those who have identified themselves already as having an addiction problem.

Formatted: Line spacing: Double

1  
2  
3  
4  
5  
6  
7  
8  
9  
10  
11  
12  
13  
14  
15  
16  
17  
18  
19  
20  
21  
22  
23  
24  
25  
26  
27  
28  
29  
30  
31  
32  
33  
34  
35  
36  
37  
38  
39  
40  
41  
42  
43  
44  
45  
46  
47  
48  
49  
50  
51  
52  
53  
54  
55  
56  
57  
58  
59  
60

## Introduction

In contrast to prescribed and illicit drugs, those available for individuals to purchase legally without prescription have often been perceived [by the public](#) to be relatively safe.[1, 2] Such non-prescription, or over-the-counter (OTC) medicines as they are also known, are typically those purchased from [non-medical outlets such as pharmacies and](#) ~~but~~ increasingly the internet [3] and have enabled individuals to be active participants in their own health.[4] There has been increasing concern, however, about the potential for OTC medicines to cause harm, as a recent All Party Parliamentary report [5], and a joint consensus statement [6] on addiction to medicines in the United Kingdom (UK) illustrate. Implicated medicines and therapeutic groups include stimulants, laxatives, sedatives, disassociative substances and opiate-containing medicines such as codeine.[7, 8] There has been increased reporting of harms associated with codeine addiction and particularly from side effects of additional ingredients, such as ibuprofen and paracetamol which have led to fatalities.[7, 9] These have resulted in regulatory changes in countries such as the UK [10] and Australia involving restricted indications and addiction warnings on codeine-containing analgesic packets.

Despite these emerging concerns, the scale of the problem remains uncertain and very little is known about the characteristics and particularly the experiences of those affected [\[7, 11\]](#). Empirical quantitative studies have provided some evidence suggesting a diverse group of individuals may be affected, ranging from adolescents experimenting with cough medicines in the USA,[\[12\]](#) to older individuals abusing analgesics in Nigeria,[\[13\]](#) and abuse of codeine-containing medicines and sedatives involving *'middle-aged females'* in the UK. [\[14, 15\]](#) Such individuals have been recognised as a hard to reach group [5] and this has resulted in indirect attempts to describe those affected, such as seeking pharmacists' proxy views of those affected through surveys. [\[7, 16\]](#) This paper describes the findings of a study that sought to explore the views and experiences of individuals who considered themselves affected by OTC medicine addiction in the UK, to understand how it arose, what medicines were implicated and how they were obtained, and what forms of treatment and support were used.

## Methods

A qualitative methodology – neglected to date in this area - was adopted for this study, which represented part of a

1  
2  
3  
4  
5  
6  
7  
8  
9 larger overall study that included stakeholders and pharmacy staff [176] - using semi-structured in-depth mainly  
10 telephone interviews. Purposive sampling was used, based on a review of the literature,[7] to ensure that a range of  
11 ages, gender, medicines used, reasons for initial use (genuine or experimental) and treatment and support options  
12 were represented. Individuals describing only prescribed medicines were excluded and since the aim was to capture  
13 self-perception of OTC medicine addiction, a dependency screening measure was not considered appropriate.[187]  
14 Recruitment was undertaken via two internet-based support groups for those affected - 'Overcount' and  
15 'Codeinefree'. A total of twenty five interviews were undertaken (see table one) over an 18 month period between  
16 2009 and 2010, reflecting a slow uptake to participate. This was considered to be related to the hard to reach nature  
17 of this group, and prospective participants often made initial contact to discuss provisions for remaining anonymous  
18 in the study. The final sample size was determined by theoretical saturation being achieved in emergent themes. An  
19 interview schedule was developed based on a review of the literature [7] [and since recruitment occurred both before](#)  
20 [and after addiction warnings were introduced in the UK, participants were either asked for their views about](#)  
21 [warnings in general, or their experiences or views of the actual change respectively.\[10\]](#) Interviews were conducted  
22 by telephone in all but two cases, and were digitally audio recorded and then fully transcribed and anonymised.  
23 Analysis of transcripts involved an initial process of open coding, which was also informed by the themes from the  
24 available literature [7] and the interview schedule. Axial coding between participant transcripts was then undertaken  
25 using the constant comparison process which involved reading and re-reading transcripts, to identify links between  
26 emerging codes and participants and their characteristics. A final process of further refining of themes was  
27 undertaken until these provided explanatory accounts of the data. University ethical approval was obtained.  
28  
29  
30  
31  
32  
33  
34  
35  
36  
37  
38  
39  
40  
41

## 42 Results

43  
44 Analysis of interviews revealed three broad, chronological themes: initial use of the medicine, often linked to  
45 genuine medical reasons; awareness of a problem with the medicine over time, with three distinct groups of dose  
46 levels being apparent, and finally attempts to seek treatment and help, which were associated with varying degrees  
47 of success. All participants described having a problem with an opiate (codeine and occasionally dihydrocodeine),  
48 although the stimulant decongestant pseudoephedrine and sedative antihistamines in sleeping medicines or cold  
49 remedies were also referred to by some. However, spanning these themes was also a dominant concern relating to  
50  
51  
52  
53  
54  
55  
56  
57  
58  
59  
60

1  
2  
3  
4  
5  
6  
7  
8  
9  
10  
11  
12  
13  
14  
15  
16  
17  
18  
19  
20  
21  
22  
23  
24  
25  
26  
27  
28  
29  
30  
31  
32  
33  
34  
35  
36  
37  
38  
39  
40  
41  
42  
43  
44  
45  
46  
47  
48  
49  
50  
51  
52  
53  
54  
55  
56  
57  
58  
59  
60

the hidden nature of OTC medicine addiction and of participant's presentation of themselves as being normal and distinct from those with other, illicit addictions. This theme will be described along with other ~~themsethemes~~ related to the unproblematic nature of obtaining medicines and views about regulation and responsibility.

#### ***Initial use of OTC medicines***

Genuine medical reasons were almost always associated with the initial use of an OTC medicine and due to the involvement of codeine for almost all of these patients, there was a not unexpected range of pain-related symptoms or conditions, including headaches and migraine, abdominal and period pain, and hangover treatments. Of note was that there was often an association with medically prescribed medicines, either through initial prescribing that had then stopped or on-going prescribing (figure one):

*I mean my story started by being on painkillers for gynaecological problems and that was when I first took codeine [...] Then I found when I couldn't get codeine on prescription any longer it was readily available over the counter. P9*

Participants using both prescribed and OTC medicines described either using OTC medicines to cover gaps before a new prescription started, or to allow the strength of medicine used to be varied. In contrast, two participants described intentionally experimenting with an OTC medicine – pseudoephedrine and codeine - having been told about their abuse potential by others (see figure two).

For all those participants who described a genuine initial use of a product, this led eventually to the medicine being taken for different reasons. The key reason cited related to codeine and whilst the effect varied, common phrases used were the 'buzz' or 'calm' associated with its use, although exploiting sedative side effects were also reported by some:

*I remember when I took them that it would give you a lift and a buzz, but that lift or buzz would go and the only way to sustain that is to take more. P11*

Pseudoephedrine was associated with its stimulant-related side effects and antihistamines like diphenhydramine were used to promote sleep. Participants reflected that abused medicines and particularly codeine allowed them to cope, particularly with significant life events such as bereavements, work or relationship problems.

1  
2  
3  
4  
5  
6  
7  
8  
9  
10  
11  
12  
13  
14  
15  
16  
17  
18  
19  
20  
21  
22  
23  
24  
25  
26  
27  
28  
29  
30  
31  
32  
33  
34  
35  
36  
37  
38  
39  
40  
41  
42  
43  
44  
45  
46  
47  
48  
49  
50  
51  
52  
53  
54  
55  
56  
57  
58  
59  
60

**Obtaining Medicines**

Participants all described the use of pharmacies to obtain supplies and two also described using internet pharmacies. A key feature of both was how unproblematic it was to obtain medicines, with policies to restrict supplies being perceived to be ineffective, and some pharmacies were considered easier than others to obtain supplies (table two). Avoiding detection was a key concern for individuals, who described intentionally varying the pharmacy used, using ‘schedules, ‘tables’ or ‘lists’ of those visited, and lying and fabricating responses to questions from staff:

*I had to go to different pharmacies and I didn't want to get knocked back. I would go in and I would make out that I had a toothache, so I didn't know the best thing. I wouldn't directly ask for the product, because I know that was suspicious. P10*

Most participants did recall isolated and uncomfortable instances of being challenged; in some cases resulting in avoiding that pharmacy or visiting less:

*I've only ever been challenged once and it was quite a confrontational challenge and...but that was back in the days when I was taking eight a day and [...] that one experience kind of altered how I did things. I started pharmacy shopping, I started varying where I went and I started to notice you know the shop workers' routines. P18*

However, but several participants considered these challenges to have influenced their attempts to seek help:

*I knew it would come sometime but you know to actually face it, that she had actually confronted me with it and that was really a wakeup call for me. P19-*

Internet pharmacy purchases were mentioned by two participants, who reported being able to obtain multiple quantities repeatedly. Although policies varied between suppliers, questionnaires or identification checks were recognized as being mechanisms that were intended to limit supplies, but which could be easily circumvented. Other participants were cautious of internet medicine supplies and expressed concerns about the lack of safety of such supplies.

**Formatted:** Font: (Default) Times New Roman, 10 pt

**Formatted:** Left, Indent: Left: 0.5", First line: 0.03", Space Before: 0 pt, After: 0 pt, Widow/Orphan control, Tab stops: Not at

**Formatted:** Font: 10 pt

**Formatted:** Font: (Default) Times New Roman, 10 pt

**Formatted:** Font: 10 pt

**Formatted:** Font: (Default) Times New Roman, 10 pt

**Formatted:** English (U.K.)

**Formatted:** Font: (Default) Times New Roman, 10 pt

**Formatted:** Indent: Left: 0.5", Line spacing: Double

**Formatted:** Font: 10 pt

1  
2  
3  
4  
5  
6  
7  
8  
9  
10  
11  
12  
13  
14  
15  
16  
17  
18  
19  
20  
21  
22  
23  
24  
25  
26  
27  
28  
29  
30  
31  
32  
33  
34  
35  
36  
37  
38  
39  
40  
41  
42  
43  
44  
45  
46  
47  
48  
49  
50  
51  
52  
53  
54  
55  
56  
57  
58  
59  
60

### *Awareness of a problem*

The second key chronological theme involved participants becoming aware of having a problem. Strikingly, the words ‘addiction’ or ‘addicted’ were frequently spontaneously used by participants to describe themselves and their situation. Awareness of a problem centred mainly on perceived withdrawal symptoms, although awareness of prolonged consumption over time, critical incidents and a perceived loss of control generally were also identified. Anxiety, generalized pain or headache and gastro-intestinal problems were variously described and attributed to the medicine having been stopped:

*Yeah I am an addict, no doubt about it. As much as a heroin addict, yeah. Shameful and it makes you feel dirty and guilty, but I was an addict, yeah. Well I have stopped taking codeine before and for the past few days I have had cold sweats and had palpitations and had withdrawal symptoms. So the physical symptoms suggest that I am addicted to it and also the psychological. P10*

Critical incidents such as rare instances of being confronted in a pharmacy, medical problem such as a gastro-intestinal bleed, or illegal activity also appeared to represent moments when participants considered themselves to have a problem. A recurrent theme involved participants’ perceived loss of control over their medicine consumption, either gradually and suddenly, and several participants expressed disbelief that addiction could have happened to them, and often drew upon professional, educational status or intelligence claims to argue that they should have had the understanding or insight to prevent this happening.

The role of the two internet support forums – particularly in postings of other individual’s descriptions - appeared to be confirmatory of their problem and participants’ use of words like ‘addiction’ and ‘rebound headache’ appeared to have originated from here. Several argued that genetic factors –in references to family members with addictions - might explain their OTC medicine addiction, and several felt their personality and previous problems – with alcohol misuse for example – was explanatory. In these accounts, participants made explicit and sustained attempts to distinguish themselves from individuals with other addictions and particularly illicit substance users, who they viewed more negatively in both a behavioural and visual sense:

*Addicts are people on the street who haven’t got a job and I am sat here in a suit in an office, my own office with a very good career, senior manager within a very large organisation and I can’t*



1  
2  
3  
4  
5  
6  
7  
8  
9 *be an addict. I am. P5*

10  
11 A respectable appearance, good employment status and education were often cited as reasons why participants were  
12 different, although there was also recognition that their addiction was ultimately the same.  
13

### 14 15 16 17 *Three types of OTC medicine abuse*

18  
19 A distinction was evident between participants based upon the quantities of medicines taken, with three types  
20 emerging (figure two) which were relative to the recommended maximum doses of specific products. A first group  
21 was characterised by self-reported use that never exceeded the recommended maximum dose of a medicine. A  
22 second type involved daily doses slightly above the maximum recommended dosage and often involving  
23 paracetamol and codeine (500mg and 8mg per tablet respectively) compound analgesics formulations and this  
24 occurred sometimes due to combinations of OTC and prescribed medicines. In both these groups, there was  
25 awareness of the harms associated with the medicine, and use for non-therapeutic reasons and perceived withdrawal.  
26 Such participants often explicitly defended their addiction status, despite the relatively low doses, and appeared  
27 aware – usually from posts on internet support groups – of individuals taking much higher doses. Such higher doses  
28 represented the third type of consumption identified in this study and was characterised by doses much higher than  
29 recommended, with those describing codeine and ibuprofen (12.8mg and 200mg per tablet respectively) compound  
30 tablet use, for example, reporting daily consumption of between 32 and 64 tablets:  
31  
32  
33  
34  
35  
36  
37  
38

39 *[...] I would take eight in one day. But then of course in increasing amounts. Till the point came*  
40 *that I was taking thirty two a day. Even on really bad days, I would take a second lot of thirty two.*  
41  
42

43 p9  
44

45 Distinct to this group was that three participants had described criminal activity relating to their addiction –  
46 convictions for theft being mentioned in two cases – and this group alone was associated with descriptions of  
47 significant health problems, including gastric bleeding and hospitalization following organ damage; significant  
48 purchasing costs were also associated with this group. However, despite these more significant issues, this group  
49 similarly differentiated themselves from those with other forms of addiction and in two cases referred to their health-  
50  
51  
52  
53  
54  
55  
56  
57  
58  
59  
60

1  
2  
3  
4  
5  
6  
7  
8  
9  
10  
11  
12  
13  
14  
15  
16  
17  
18  
19  
20  
21  
22  
23  
24  
25  
26  
27  
28  
29  
30  
31  
32  
33  
34  
35  
36  
37  
38  
39  
40  
41  
42  
43  
44  
45  
46  
47  
48  
49  
50  
51  
52  
53  
54  
55  
56  
57  
58  
59  
60

care professional backgrounds to support their claims.

#### ***A 'hidden' addiction***

In describing their situations, individuals often described overt attempts to keep their problem hidden, and this occurred particularly at work where concerns about a perceived change in appearance or behaviour were thought likely to arouse suspicions amongst colleagues. Of note was that it was the change in appearance that worried participants primarily, and not being seen taking a medicine, which was considered by them to be an everyday activity which would not arouse suspicion in itself. Keeping medicine abuse hidden from family and home environments was also identified, although for a minority, friends and family were aware and had provided support. Many participants also referred to the influence of OTC abuse on their family and relationships more generally, with a tension being apparent in trying to keep OTC addiction secret but recognising the support that others could offer. For some, family and friends were viewed positively and provided support when a participant was trying to seek treatment, but in other cases much less so:

*To be honest, I can't discuss it with my family. They simply wouldn't understand. It would be a horror for them. And they don't deal with things like that very well, at all.* P6

#### ***Treatment and support***

The third main chronological theme concerned subsequent attempts by all individuals to address their OTC medicine addiction. These varied considerably and appeared in part related to the quantities of medicine taken (table 2) and included internet support group help in all cases, as well as National Health Service (NHS) medical General Practitioner (GP) consultations, specialist NHS drug and alcohol treatment (DAAT) services, a private clinic, counselling, self-management and narcotics anonymous (see figure two). Perceived benefits of these varied, with initial self-treatment, for example, often being considered ineffective and there was a view that several services, particularly narcotics anonymous and specialist drug services, were not suited to OTC medicine addiction. Participants' need for anonymity was again evident, with concerns being expressed about addiction being recorded

1  
2  
3  
4  
5  
6  
7  
8  
9  
10  
11  
12  
13  
14  
15  
16  
17  
18  
19  
20  
21  
22  
23  
24  
25  
26  
27  
28  
29  
30  
31  
32  
33  
34  
35  
36  
37  
38  
39  
40  
41  
42  
43  
44  
45  
46  
47  
48  
49  
50  
51  
52  
53  
54  
55  
56  
57  
58  
59  
60

in medical notes and employers and others becoming aware; this extended to the intentional use of pseudonyms by participants on internet support groups. Of note was that pharmacists were ~~not referred to at all~~ ~~et considered relevant in relation to~~ treatment and support.

GP involvement led to both positive and negative comments although some participants had specifically not sought GP advice, due either to poor existing relationships or, linked to the hidden nature of this issue, concerns about their addiction being recorded. Many participants felt their doctor considered OTC medicine addiction to be less serious than other addictions and something not to be concerned about or suited to simple self-management:

*[...] I have mentioned it to the doctor and he sort of said, 'well it's something you handle yourself'. At this sort of level [...]* P19

Some GPs had attempted to treat, although experiences suggested this was not successful:

*[...] my GP, he tried to detox me with the dihydrocodeine [...] I just ended up taking the tablets over a week, you know, that was failure you know.* P3

More positively, others described being referred by their GP to specialist drug and alcohol services, and these were associated most often with those taking considerably higher doses of medicine and occurred also from self-referrals and court orders. The overwhelming experience for all participants was that such services were not set-up to accommodate those with OTC addiction and several factors were evident. The mixing of clients with different addictions was considered a problem, and there was a perception that staff viewed OTC addiction as a lesser problem, and also lacked experience:

*'I have got a problem with being addicted to co-codamol'. They thought I was being a bit stupid. I think they thought that you know that I should just withdraw slowly.* P13

Treatment options ~~involving specific~~ medicines were also viewed problematically, mainly due to their association with illicit drug treatment or having supervised consumption:

*I was turning up to [local] drug unit for my daily dose of methadone as though I was a heroin addict [...]. At that stage, I didn't think that methadone was appropriate.* P22

1  
2  
3  
4  
5  
6  
7  
8  
9  
10  
11  
12  
13  
14  
15  
16  
17  
18  
19  
20  
21  
22  
23  
24  
25  
26  
27  
28  
29  
30  
31  
32  
33  
34  
35  
36  
37  
38  
39  
40  
41  
42  
43  
44  
45  
46  
47  
48  
49  
50  
51  
52  
53  
54  
55  
56  
57  
58  
59  
60

However, the accounts provided [from those consuming more significant amounts of opiates](#) suggested that such services, and the use of buprenorphine and methadone, often led to positive outcomes – either on maintenance doses or opiate free - even if concerns were initially apparent about such treatments being inappropriate and suited only for illicit substance misusers.

Self-treatment was often something considered as a first stage, when awareness of a problem had occurred, but it was also attempted as a response to guidance and support from internet support groups. Participants described either stopping completely or reducing the dose gradually:

*I went cold turkey as they say. I was on my own in our place [...] and I decided that I'd had enough of basically the rounds of going to the doctors and getting the stuff, having problems maybe getting the stuff and then going to different chemists. P14*

The two on-line support groups – Overcount and Codeinefree - appeared to be particularly relevant in attempts to self-treat, and appeared to have been found during general searches of the internet for information about their addiction. The two website were perhaps the most positively received of all the options available to participants based on their experiences, and provided treatment options, including specific advice with direct communication from web site staff and participants and also generic information on the web sites and from other's posts. The web sites offered a positive confirmatory function for many, as when [one participant \(P25\) Michelle](#) noted, *'there are many more in the same boat, going through the same struggle'* although participants' level of engagement with the sites varied considerably and whilst some continued to actively interact, other stopped after the initial confirmatory aspect.

Formatted: Font: Italic

### ***Responsibility and regulation***

All participants were asked for their views on how OTC addiction could be prevented, and issues were identified in terms of the overall availability of OTC medicines, the use of information and particularly addiction warnings, and the balance between professional and personal responsibility. Of note was that most participants were in favour of the continued availability of OTC medicines with addiction potential and often blamed themselves for their

1  
2  
3  
4  
5  
6  
7  
8  
9 situation. Convenient access to medicines was often argued to outweigh the addiction risks to a minority, and this  
10 view was advanced irrespective of the level of consumption by participants:

11  
12 *Everyone should have a choice what they do with their life - as long as they have the awareness of*  
13 *the danger then it's up to each individual what they do with that information and what path they*  
14 *choose.* P25  
15  
16  
17

18 Analogies were drawn by several to the current availability of other substances that can cause addiction, like tobacco  
19 and alcohol, and that their continued availability supported the availability of OTC medicines. A minority felt that  
20 the need to avoid harm was paramount and advocated prescription-only availability, although recognising that this  
21 may increase doctors' workloads and NHS costs. The addition of addiction warnings to packets was considered  
22 relevant [only](#) to those not already addicted:  
23  
24  
25

26  
27 *So I mean it is better than nothing certainly to have a warning on the packet [...] and it will put*  
28 *some people off, but the people who need to be put off, I am not sure it would.* P14  
29  
30

31 [This view was held by those interviewed both before and after the addiction warnings were introduced and for those](#)  
32 [still taking OTC medicines at the time of the study, there was a lack of awareness, which one participant \(P5\)](#)  
33 [summed up as: 'I've not noticed, but then again I'm not looking'.](#) There was little awareness of regulatory changes  
34 relating to pack sizes in the UK [from those interviewed after the changes](#), but a view that, like warnings, these  
35 [changes](#) may have some benefit, but only to those who did not already have a problem.  
36  
37  
38

Formatted: Font: (Default) Times New Roman, 10 pt

39 Participants spontaneously raised the issues of responsibility and most felt that they were responsible as individuals,  
40 and had decided to use the medicine and should have noticed changes in use. This was often linked to assertions by  
41 participant that they were intelligence and a recurrent theme was the claim that they were controlled individuals,  
42 often with successful jobs and graduate and post-graduate university qualifications, and for whom OTC addiction  
43 was in some respects atypical:  
44  
45  
46

47  
48 *You know I am not an unintelligent fellow and I have got access to the internet like everybody else.*  
49 *I knew what the consequences were, but I still couldn't stop it.* P14  
50  
51

52 Whilst other factors may have been contributory for a minority – such as pharmacies who continued to supply, or a  
53  
54  
55  
56  
57  
58  
59  
60

1  
2  
3  
4  
5  
6  
7  
8  
9  
10  
11  
12  
13  
14  
15  
16  
17  
18  
19  
20  
21  
22  
23  
24  
25  
26  
27  
28  
29  
30  
31  
32  
33  
34  
35  
36  
37  
38  
39  
40  
41  
42  
43  
44  
45  
46  
47  
48  
49  
50  
51  
52  
53  
54  
55  
56  
57  
58  
59  
60

GP who prescribed inappropriately in one case, or post-operative care which did not address analgesic needs – it was ultimately considered a personal cause and resultant problem.

## Discussion

### *Main Findings, Strengths and Weaknesses*

The main findings of this study are that ~~self-reported~~~~perceived~~ OTC medicine addiction arises from often genuine medical reasons linked to prescribing rather than experimentation, and that obtaining medicines appeared unproblematic and treatment options vary in perceived suitability and success. A strength of the study was the use of sampling via internet support groups that enabled recruitment of a recognised hard to reach group and to allow them to present their experiences in depth in a qualitative empirical study. ~~However, A-related study limitations~~ ~~are~~ ~~was~~ that the sample reflected only those individuals who had internet access and already recognised they had a problem ~~and that those who had not engaged with these support groups were not represented. In addition, the dominance of codeine amongst participants may be related to one of the internet support groups primarily supporting~~ ~~targeting only those affected by opiates.~~ Only UK perspectives were presented, although the range of medicines, pharmacy-based supplies and regulations in the UK are broadly similar to those found in many other countries across Europe and also Australia. ~~Analysis of interviews solely by the researcher and hence without either participant or other researcher validation or coding respectively represents a further study limitation.~~

### *Relevance to Existing Literature and Implications of Results*

The study provides further evidence that several medicines – opiates, stimulants and sedatives [7, 8] – are implicated in OTC medicine abuse and whilst illustrating the primacy of codeine as a concern, also highlights that other medicines are abused for non-therapeutic effects. It also indicates that problems can occur in a range of doses, and supports previous research in Australia [187] that found both high and low dose dependency although there was less evidence of experimental or recreational use in the present study. The findings suggest there is a need to raise awareness about the possibility of OTC medicine addiction, both for prevention and also treatment and support.

1  
2  
3  
4  
5  
6  
7  
8  
9 Whilst previous research has suggested awareness amongst the public about the abuse potential of medicines, this  
10 may reflect terminological confusion over misuse rather than addiction potential [195] and so alerting the public to  
11 the potential for addiction is necessary, such as through warnings on packets. Also alerting doctors who prescribe  
12 medicines initially is important, since this study suggests that the cessation of prescribed medicines or more complex  
13 patterns of concomitant use of prescribed and OTC medicines may be associated with OTC medicine addiction.  
14 This, again, reflected often genuine reasons for initial OTC medicine use rather than intentional experimentation.  
15 Research has suggested a high level of awareness of OTC medicine abuse potential amongst GPs but also the need  
16 for more training [2049] and this may be necessary given other concerns that doctors seldom question patient's self-  
17 treatment and use of OTC medicines.[210] Raising awareness of the distinct nature and concerns of this group is  
18 also needed for other health-care professionals, such as those in addiction services, given concerns in this study, and  
19 the literature [15] as to the appropriateness of some services. This also applies to pharmacists and particularly since  
20 research suggests that they may experience uncertainty about how to support those affected.-[176] [This study offers](#)  
21 [suggestions about possible questions for health-care professionals such as pharmacists and prescribers, particularly](#)  
22 [in relation to individuals experiencing more severe self-reported problems. For example, asking if individuals had](#)  
23 [ever taken more than the recommended maximum dose, if their medicine use had affected their work or social life,](#)  
24 [or if they felt they had lost control over their medicine use have all emerged from this study. However, and it is also](#)  
25 [of note that pharmacists were not referred to by participants at all in relation to treatment or support in the present](#)  
26 [study, and this not only reflects previous omissions in the literature, \[5\] but also -concerns around difficulties in](#)  
27 [implementing harm-reduction strategies in this setting. \[7, 11, 22\].](#)  
28  
29  
30  
31  
32  
33  
34  
35  
36  
37  
38

#### 39 *Emerging Problems for Practice*

40  
41  
42 The results of this study reveal a number of tensions that may be problematic in supporting those affected and  
43 preventing addiction to medicine. The first involves reconciling individuals' self-perception of addiction and the  
44 need for associated support with doses taken since of the three types of consumption identified, those never  
45 exceeding the maximum dose, for example, may have a much lower risk of harm and existing opiate addiction  
46 treatments may be clinically inappropriate. This is not to suggest that there are not genuine problems in all three  
47 types of consumption identified, and the qualitative nature of this study has revealed detailed accounts of a range of  
48 negative experiences of OTC addiction, with issues of shame and adverse effects on health, work and relationships,  
49  
50  
51  
52  
53  
54  
55  
56  
57  
58  
59  
60

1  
2  
3  
4  
5  
6  
7  
8  
9  
10  
11  
12  
13  
14  
15  
16  
17  
18  
19  
20  
21  
22  
23  
24  
25  
26  
27  
28  
29  
30  
31  
32  
33  
34  
35  
36  
37  
38  
39  
40  
41  
42  
43  
44  
45  
46  
47  
48  
49  
50  
51  
52  
53  
54  
55  
56  
57  
58  
59  
60

for example, which are recognised in the wider addiction literature.[234] Sub-therapeutic dependence has also emerged in other OTC medicine research [187] but such use may arguably also be related more to a perceived loss of control than to therapeutic dependency.[187, 242] A further and related tension arises in the influence of the internet support groups, and whilst being viewed positively overall and offering important support and treatment advice, this study suggests that they may contribute to a perception in some individuals that they are addicted, even at low doses. This potential widening of the types of addiction in society is an increasing concern [253] and one which may also threaten the previous aim of raising awareness amongst doctors, since this may suggest a wider range of affected patients than might actually require identification and referral for treatment.

A tension also arises in participants' perception that they are different from those with other addictions and that treatments are not appropriate, and trying to reconcile this with participants' insight that they have a problem and that existing treatments appear to be effective in some cases. This will require a consideration about how such treatments and services are presented and communicated to individuals, in a way that recognises participants' anxieties about reporting in medical records and keeping their addiction hidden. There are parallels in this respect with addiction to prescribed medicines and of how to support those affected by these too. A final tension centres on making OTC medicines of potential abuse available to the public – which almost all participants supported – whilst recognising the potential harms for some individuals. This confirms the important of choice and recognition moreover of a public who '*want autonomy and freedom to choose such medicines.*' [264]

## Conclusions

A range of problems have emerged from individuals who experienced addiction to OTC medicines, with distinct dose ranges emerging through often genuine initial reasons for use, via often unproblematic supplies from pharmacies and occasionally the internet, with medical prescribing being associated in many cases. Current treatment and support was not perceived appropriate, and those affected considered themselves different to others with addiction problems. Raising awareness about OTC medicine addiction is needed for the public and also health care professionals, and providing and communicating treatment options that are sensitive to those affected is needed.



**Acknowledgements** Thanks to all the participants in the study

**Funding** This work was supported by a Pharmacy Practice Research Trust Grant

**Competing Interests** None

**Participant Consent** Obtained

**Ethics Approval** University ethical approval obtained

**Data Sharing Statement** Anonymised copies of interview transcripts may be obtained upon request from [richard.cooper@sheffield.ac.uk](mailto:richard.cooper@sheffield.ac.uk) although consent was not obtained from participants for further research use of data.

Field Code Changed

## References

- 1 Bissell P, Ward PR, Noyce PR. The Dependent Consumer: Reflections on Accounts of the Risks of Non-Prescription Medicines. *Health*. 2001; **5(1)**: 5-30.
- 2 Rounie CL, Griffin MR. Over the counter analgesics in older adults: a call for improved labelling and consumer education. *Drugs and Aging* 2004; **21(8)**: 485-498.
- 3 Bessell TL. Surfing, self-medicating and safety: buying non-prescription and complementary medicines via the internet. *Quality and Safety in Health Care* 2003; **12(2)**: 88-92.
- 4 Bond CM, Bradley C. Over the Counter Drugs: The interface between the community pharmacist and patients. *British Medical Journal* 1996; **312(7033)**: 758-760.
- 5 Reay G. *All-Party Parliamentary Drugs Misuse Group. An Inquiry into Physical Dependence and Addiction to Prescription and Over-the-Counter Medication*. 2009, London
- 6 Royal College of General Practitioners *Addiction to Medicines Consensus Statement January 2013* 2013 London: RCGP
- 7 Cooper RJ Over-the-Counter Medicine Abuse: A Review of the Literature. *Journal of Substance Use* 2011 [on-line October 3, 2011 doi 10.3109/14659891.2011.615002]
- 8 Lessenger JE, Feinberg SD. Abuse of prescription and over-the-counter medications. *Journal of the American Board of Family Medicine* 2008; **1(1)**: 45-54.
- 9 Frei MY, Nielsen S, Dobbin M, Tobin CL. Serious morbidity associated with misuse of over-the-counter

Formatted: Space Before: 0 pt, After: 0 pt, Line spacing: Double

Formatted: Space After: 0 pt, Line spacing: Double

Formatted: Space Before: 0 pt, After: 0 pt, Line spacing: Double

Formatted: Space After: 0 pt, Line spacing: Double

1  
2  
3  
4  
5  
6  
7  
8  
9  
10  
11  
12  
13  
14  
15  
16  
17  
18  
19  
20  
21  
22  
23  
24  
25  
26  
27  
28  
29  
30  
31  
32  
33  
34  
35  
36  
37  
38  
39  
40  
41  
42  
43  
44  
45  
46  
47  
48  
49  
50  
51  
52  
53  
54  
55  
56  
57  
58  
59  
60

codeine-ibuprofen analgesics: A series of 27 cases. *Medical Journal of Australia* 2011; **193**(5), : 294–296.

10 Medicines and Healthcare products Regulatory Agency. *MHRA Public Assessment Report. Codeine and dihydrocodeine-containing medicines: minimising the risk of addiction*. 2009. London, MHRA.

Formatted: Space Before: 0 pt, After: 0 pt, Line spacing: Double

11 [Nielsen S, Cameron J, Lee N. Characteristics of a nontreatment-seeking sample of over-the-counter codeine users: implications for intervention and prevention. \*J Opioid Manag\* 2011;7:363-70](#)

Formatted: Font: 10 pt

Formatted: Font: 10 pt, Italic

Formatted: Font: 10 pt

12 Steinman K. High school students' misuse of over-the-counter drugs: A population-based study in an urban county. *Journal of Adolescent Health* 2006; **38**(4): 445–447.

Formatted: Font color: Black

13 Agaba EI, Agaba PA, Wigwe CM. Use and abuse of analgesics in Nigeria: a community survey. *Nigerian Journal of Medicine*. 2004; **13**(4): 379-82.

14 Akram G. Over-the-counter medication: an emerging and neglected drug abuse? *Journal of Substance Use* 2000; 5(2): 136-142.

15 National Treatment Agency. *Addiction to medicine: an investigation into the configuration and commissioning of treatment services to support those who develop problems with prescription-only or over-the-counter medicine*. London 2010

16 Matheson C. Misuse of over-the-counter medicines from community pharmacies: a population survey of Scottish pharmacies. *Pharmaceutical Journal*, 2002. 269, 66–68.

Formatted: Line spacing: Double

Formatted: Font: (Default) Times New Roman

Formatted: Font: (Default) Times New Roman, Italic

Formatted: Font: (Default) Times New Roman

17 Cooper RJ Surveillance and uncertainty: community pharmacy responses to over the counter medicine abuse. *Health and Social Care in the Community* 2013;doi: 10.1111/hsc.12012 (published early online 16 Jan 2013)

Formatted: Indent: Left: 0", Hanging: 0.5", Line spacing: Double

Formatted: Space After: 0 pt, Line spacing: Double

Formatted: Font: Italic

18 Nielsen S, Cameron J, Pahoki, S. *Over the Counter Codeine Dependence Final Report 2010*. 2010. Victoria: Turning Point.

Formatted: Line spacing: Double

19 Wazaify M., Shields E, Hughes C.M, McElnay JC. Societal perspectives on over-the-counter (OTC) medicines. *Family Practice* 2005;**22**:170-1.

Formatted: Font: (Default) Times New Roman

20 Hughes GF, Bell HM, McElnay JC. General practitioners' awareness of the appropriate and inappropriate use of over-the-counter products. *Pharmaceutical Journal* 1999; 263(7063):R29

Formatted: Space Before: 0 pt, After: 0 pt, Line spacing: Double

Formatted: Font: Not Bold

21 Britten N. *Medicines and Society Patients, Professionals and the Dominance of Pharmaceuticals*. 2008

Formatted: Line spacing: Double

1  
2  
3  
4  
5  
6  
7  
8  
9  
10  
11  
12  
13  
14  
15  
16  
17  
18  
19  
20  
21  
22  
23  
24  
25  
26  
27  
28  
29  
30  
31  
32  
33  
34  
35  
36  
37  
38  
39  
40  
41  
42  
43  
44  
45  
46  
47  
48  
49  
50  
51  
52  
53  
54  
55  
56  
57  
58  
59  
60

—Basingstoke: Palgrave Macmillan.

- 224. [Nielsen S, Cameron J, Pahoki S. Opportunities and challenges: over-the-counter codeine supply from the codeine consumer's perspective. \*International Journal of Pharmacy Practice\*. 2012 Article first published online: 25 OCT 2012 DOI: 10.1111/j.2042-7174.2012.00247.x](#)
- 23. O'Connor L, Berry JW, Inaba D, Weiss J, Morrison A. Shame, guilt, and depression in men and women in recovery from addiction. *Journal of Substance Abuse Treatment* 1994; **11(6)**: 503-510.
- 242. Reith G Consumption and its discontents: addiction, identity and the problems of freedom. *The British Journal of Sociology* 2004; **55(2)**: 283-300.2
- 253. Hacking I. Making Up People. In T. C. Heller & M. Sosna, eds. *Reconstructing Individualism: Autonomy, Individuality, and the Self in Western Thought*. 1987. Stanford: Stanford University Press, pp. 222-236..
- 26. Hanna L, Hughes C. Public's views on making decisions about over-the-counter medication and their attitudes towards evidence of effectiveness: a cross-sectional questionnaire study. *Patient Education and Counselling* 2011; **83(3)**: 345-351.

**Formatted:** Font: Not Bold

**Formatted:** Normal (Web), Left, Space Before: 0 pt, After: 0 pt, Line spacing: Double, Widow/Orphan control, Adjust space between Latin and Asian text, Adjust space between Asian text and numbers

**Formatted:** Font: 10 pt

**Formatted:** Font: Not Bold

**Formatted:** Font: Not Bold, Italic

**Formatted:** Font: Italic

**Formatted:** Font: 10 pt

**Formatted:** English (U.K.)

**Formatted:** Space Before: 0 pt, After: 0 pt, Line spacing: Double

**Formatted:** Space Before: 0 pt, After: 0 pt

| Participant number | Sex | Age           | Employment                      | Product                                            | Dose(s) used and typology*                | Current use? | Treatment(s) & support used     |
|--------------------|-----|---------------|---------------------------------|----------------------------------------------------|-------------------------------------------|--------------|---------------------------------|
| 1                  | F   | 40s           | Housewife                       | Solpadeine + diverted Solpadol                     | Varied, up to 12-13/day II                | No           | 'Cold turkey', CF web site      |
| 2                  | F   | 60s           | Professional                    | Nurofen Plus                                       | No more than 6/day I                      | No           | CF                              |
| 3                  | M   | 40s           | Unemployed                      | Paramol +Sudafed for short period +alcohol         | Up to 36/day either 16+16 or 12+12+12 III | No           | GP, DAAT (methadone), Overcount |
| 4                  | M   | Not disclosed | Professional                    | Co-codamol, then Syndol                            | Up to 8 per day I                         | Yes          | GP, CF                          |
| 5                  | M   | 30s           | Professional                    | Co-codamol                                         | 12-14/day II                              | Yes          | CF                              |
| 6                  | M   | 30s           | Professional self-employed      | Nurofen Plus + prev. non-opiate illicit substances | Max of 60 tablets/ day III                | No           | GP, DAAT (Buprenorphine) CF     |
| 7                  | F   | Not disclosed | Former health care professional | Solpadeine                                         | Up to 8/day I                             | No           | CF                              |
| 8                  | F   | Not disclosed |                                 | Co-codamol soluble +Rx co-codamol 30/500           | Up to 16/day (max 4/dose) II              | No           | CFM                             |
| 9                  | F   | Not disclosed | Health care professional        | Nurofen Plus                                       | 32/day (very occ. 64/day) III             | No           | CF + buprenorphine              |
| 10                 | F   | 30s           | Uni student                     | Feminax then Cuprofen Plus prev. alcohol           | 36/day III                                | Yes          | CF                              |
| 11                 | F   | 40s           | professional                    | Nurofen Plus                                       | 24/day III                                | No           | CF                              |
| 12                 | F   | 20s           | Professional                    | Co-codamol + prescribed                            | Up to 8/day I                             | No           | CF                              |
| 13                 | F   | Not disclosed | Professional                    | Co-codamol + prescribed                            | up to 16/day occasionally + prescribed II | Yes          | GP, Overcount                   |
| 14                 | M   | 50s           | Retired Professional            | Nurofen Plus + prescribed codeine phosphate        | 10/day Nurofen plus + MDD of codeine III  | No           | Overcount                       |
| 15                 | M   | 60s           | Professional                    | Solpadeine soluble                                 | very occasionally 10/day II               | No           | Private treatment               |
| 16                 | M   | Not           | Professional                    | Phensedyl                                          | 90                                        | No           | GP, DAAT                        |

|    |   |               |                                 |                                                                      |                                                               |               |                              |
|----|---|---------------|---------------------------------|----------------------------------------------------------------------|---------------------------------------------------------------|---------------|------------------------------|
|    |   | disclosed     |                                 |                                                                      | bottles/week<br>III                                           |               |                              |
| 17 | M | Not disclosed | Professional                    | Panadol Ultra and Nurofen Plus                                       | 15-20 of each<br>III                                          | No            | GP                           |
| 18 | M | Not disclosed | Not disclosed                   | Solpadeine                                                           | 4/day<br>I                                                    | No            | Overcount                    |
| 19 | M | Not disclosed | Self-employed                   | Nurofen Plus                                                         | 10/day<br>II                                                  | Yes           | CF, DAAT, GP                 |
| 20 | F | Not disclosed | Not disclosed                   | Solpadeine                                                           | Up to 8/day<br>I                                              | Yes           | Overcount                    |
| 21 | F | Not disclosed | Not disclosed                   | Syndol                                                               | Up to 8/day<br>I                                              | Yes           | CF, GP                       |
| 22 | M | Not disclosed | Former health care professional | Codeine linctus, Gees linctus, stolen dihydrocodiene                 | Varied but much above max daily dose. III                     | No            | CF + DAAT (methadone)        |
| 23 | M | 60s           | Retired professional            | Phensedyl, Actifed, Codeine linctus<br>Diverted prescription codeine | 200ml codeine linctus/day<br>III                              | no            | CF + GP + DAAT (methadone)   |
| 24 | F | 30s           | Professional                    | Syndol + Nytol                                                       | Syndol: prev. up to 8/day, now 12/day in last 12 months<br>II | Yes<br>Syndol | Overcount                    |
| 25 | F | 50s           | Professional                    | Feminax, then Veganin                                                | 6-10/day.<br>Max=12/day<br>II                                 | Yes           | Overcount + GP + Drug Action |

## Key

I = consuming less than maximum recommended dose

II = consuming slightly higher than maximum recommended doses

III = consuming significantly higher than maximum recommended doses

GP = general practitioner (doctor)

DAAT = Drug and alcohol treatment

CF = CodeineFree (internet support)

Overcount = Internet support

M = male

F = female

Table 1 – Participant Details

|    |                                                                                                         |
|----|---------------------------------------------------------------------------------------------------------|
| 1  |                                                                                                         |
| 2  |                                                                                                         |
| 3  |                                                                                                         |
| 4  | Many participants, and especially those taking higher doses, varied where they made purchases           |
| 5  |                                                                                                         |
| 6  | A number of different pharmacies were often located in close proximity to participants                  |
| 7  |                                                                                                         |
| 8  | Pharmacy staff often asked questions but seldom challenged participants.                                |
| 9  |                                                                                                         |
| 10 | Participants provided responses to pharmacy staff questions that would not lead to challenges           |
| 11 |                                                                                                         |
| 12 | Occasional references were made to pharmacies that sold multiple packs.                                 |
| 13 |                                                                                                         |
| 14 | Participants, such as those taking doses less than the maximum, did not need to visit pharmacies often. |
| 15 |                                                                                                         |

16 Table two – Reasons why pharmacy purchases were considered unproblematic

17

18

19

20

21

22

23

24

25

26

27

28

29

30

31

32

33

34

35

36

37

38

39

40

41

42

43

44

45

46

47

48

49

50

51

52

53

54

55

56

57

58

59

60

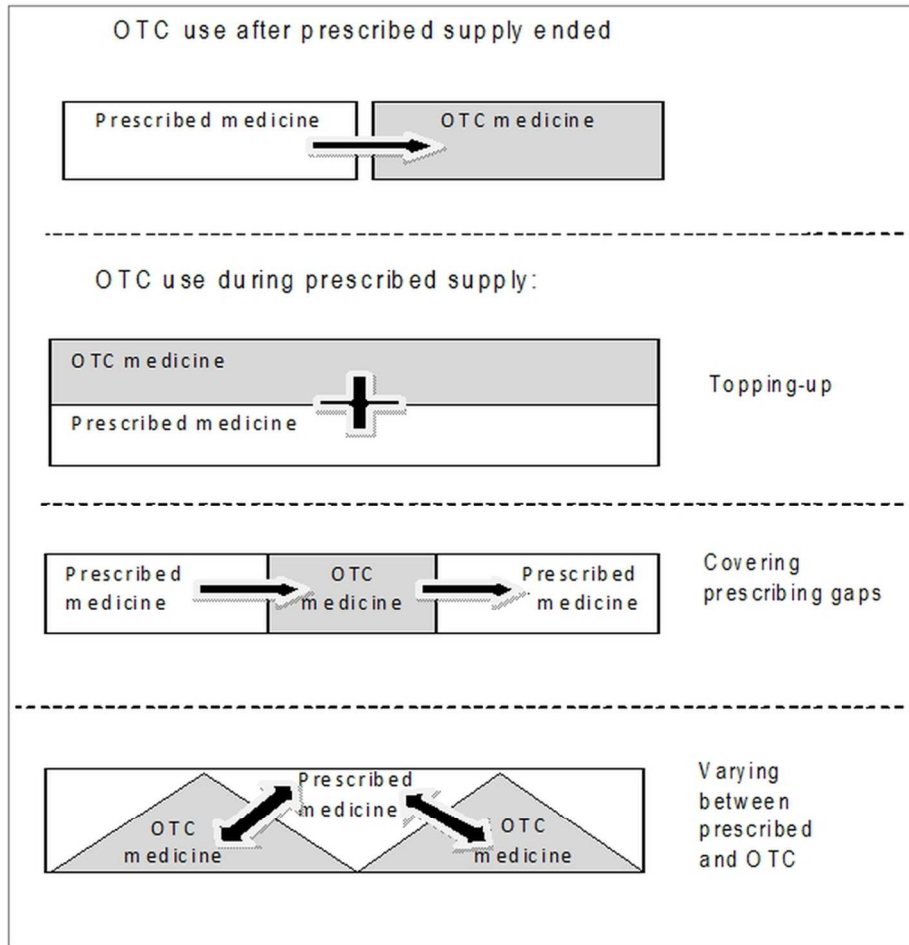

Figure one – relationship between OTC medicine use and prescribed medicines

90x93mm (300 x 300 DPI)

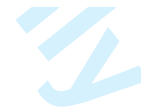

1  
2  
3  
4  
5  
6  
7  
8  
9  
10  
11  
12  
13  
14  
15  
16  
17  
18  
19  
20  
21  
22  
23  
24  
25  
26  
27  
28  
29  
30  
31  
32  
33  
34  
35  
36  
37  
38  
39  
40  
41  
42  
43  
44  
45  
46  
47  
48  
49  
50  
51  
52  
53  
54  
55  
56  
57  
58  
59  
60

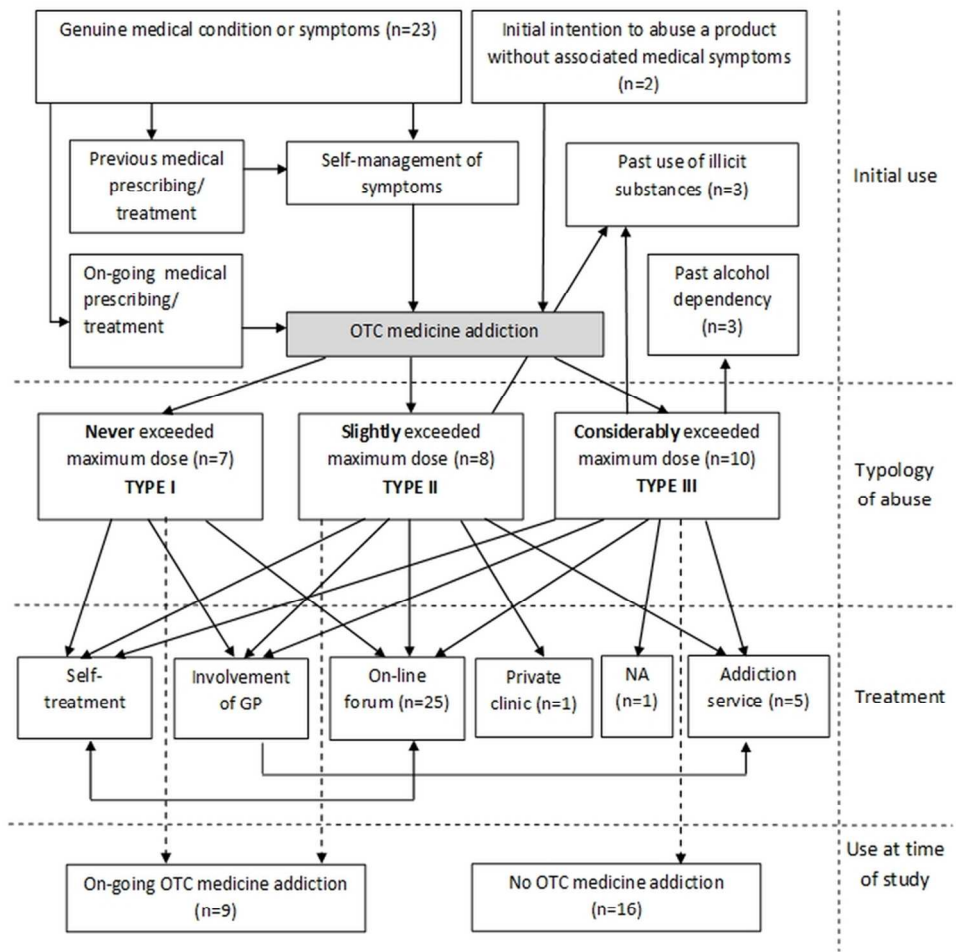

Figure Two – Summary of different initial use, types of use and treatment

90x91mm (300 x 300 DPI)

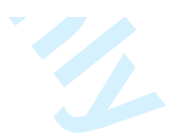

Supplement: bmjopen-2013-002913.draft_revisions.pdf [file bmjopen-2013-002913.draft_revisions.pdf]
